# Supplementary material for: Application of a targeted-enrichment methodology for full-genome sequencing of Dengue 1-4, Chikungunya and Zika viruses directly from patient samples
Source: PLoS Negl Trop Dis. 2019 Apr 25;13(4):e0007184. doi: 10.1371/journal.pntd.0007184 (PMC6504110; doi:10.1371/journal.pntd.0007184)
Supplement: S1 Table — (XLSX) [file pntd.0007184.s006.xlsx]

## Sheet: Sheet1
S1 Table - NCBI genomes used to design baits
Dengue Virus 1,2,3 and 4	Zika virus	Chikungunya virus
gi|6065682|emb|A75711.1|	gi|975885971|gb|KU365780.1|	gi|1016106484|gb|KT192740.1|
gi|6740690|emb|A91810.1|	gi|975885969|gb|KU365779.1|	gi|1016106482|gb|KT192739.1|
gi|6740694|emb|A91814.1|	gi|975885966|gb|KU365778.1|	gi|1016106480|gb|KT192738.1|
gi|6740696|emb|A91816.1|	gi|975885964|gb|KU365777.1|	gi|1016106478|gb|KT192737.1|
gi|1945602|dbj|AB003090.1|	gi|974030530|gb|KT200609.1|	gi|1016106476|gb|KT192736.1|
gi|4239824|dbj|AB010982.1|	gi|973447410|gb|KU312315.1|	gi|1016106474|gb|KT192735.1|
gi|4239826|dbj|AB010983.1|	gi|973447408|gb|KU312314.1|	gi|1016106472|gb|KT192734.1|
gi|4239828|dbj|AB010984.1|	gi|973447406|gb|KU312313.1|	gi|1016106470|gb|KT192733.1|
gi|4239830|dbj|AB010985.1|	gi|973447404|gb|KU312312.1|	gi|1016106468|gb|KT192732.1|
gi|4239832|dbj|AB010986.1|	gi|969945756|gb|KU321639.1|	gi|1016106466|gb|KT192731.1|
gi|4239834|dbj|AB010987.1|	gi|572167488|gb|KF268950.1|	gi|1016106464|gb|KT192730.1|
gi|4239836|dbj|AB010988.1|	gi|572167486|gb|KF268949.1|	gi|1016106462|gb|KT192729.1|
gi|4239838|dbj|AB010989.1|	gi|572167484|gb|KF268948.1|	gi|1016106460|gb|KT192728.1|
gi|4239840|dbj|AB010990.1|	gi|746657104|gb|KM078979.1|	gi|1016106458|gb|KT192727.1|
gi|12060258|dbj|AB038465.1|	gi|746657102|gb|KM078978.1|	gi|1016106456|gb|KT192726.1|
gi|12060260|dbj|AB038466.1|	gi|746657100|gb|KM078977.1|	gi|1016106454|gb|KT192725.1|
gi|12060262|dbj|AB038467.1|	gi|746657098|gb|KM078976.1|	gi|1016106452|gb|KT192724.1|
gi|12060264|dbj|AB038468.1|	gi|746657096|gb|KM078975.1|	gi|1016106450|gb|KT192723.1|
gi|12060266|dbj|AB038469.1|	gi|746657094|gb|KM078974.1|	gi|1016106448|gb|KT192722.1|
gi|12060268|dbj|AB038470.1|	gi|746657092|gb|KM078973.1|	gi|1016106446|gb|KT192721.1|
gi|12060270|dbj|AB038471.1|	gi|746657090|gb|KM078972.1|	gi|1016106444|gb|KT192720.1|
gi|12060272|dbj|AB038472.1|	gi|746657088|gb|KM078971.1|	gi|1016106442|gb|KT192719.1|
gi|12060274|dbj|AB038473.1|	gi|746657086|gb|KM078970.1|	gi|1016106440|gb|KT192718.1|
gi|12060276|dbj|AB038474.1|	gi|746657084|gb|KM078969.1|	gi|1016106438|gb|KT192717.1|
gi|12060278|dbj|AB038475.1|	gi|746657082|gb|KM078968.1|	gi|1016106436|gb|KT192716.1|
gi|12060280|dbj|AB038476.1|	gi|746657080|gb|KM078967.1|	gi|1016106434|gb|KT192715.1|
gi|12060282|dbj|AB038477.1|	gi|746657078|gb|KM078966.1|	gi|1016106432|gb|KT192714.1|
gi|12060284|dbj|AB038478.1|	gi|746657076|gb|KM078965.1|	gi|1016106430|gb|KT192713.1|
gi|12060286|dbj|AB038479.1|	gi|746657074|gb|KM078964.1|	gi|1016106428|gb|KT192712.1|
gi|17129645|dbj|AB074760.1|	gi|746657072|gb|KM078963.1|	gi|1016106426|gb|KT192711.1|
gi|17129647|dbj|AB074761.1|	gi|746657070|gb|KM078962.1|	gi|1016106424|gb|KT192710.1|
gi|31339319|dbj|AB111064.1|	gi|746657068|gb|KM078961.1|	gi|1016106422|gb|KT192709.1|
gi|31339321|dbj|AB111065.1|	gi|746657066|gb|KM078960.1|	gi|1016106420|gb|KT192708.1|
gi|31339323|dbj|AB111066.1|	gi|746657064|gb|KM078959.1|	gi|1016106417|gb|KT192707.1|
gi|31339325|dbj|AB111067.1|	gi|746657062|gb|KM078958.1|	gi|908376637|gb|KT247385.1|
gi|31339327|dbj|AB111068.1|	gi|746657060|gb|KM078957.1|	gi|908376635|gb|KT247384.1|
gi|31339329|dbj|AB111069.1|	gi|746657058|gb|KM078956.1|	gi|908376633|gb|KT247383.1|
gi|31339331|dbj|AB111070.1|	gi|746657056|gb|KM078955.1|	gi|908376631|gb|KT247382.1|
gi|31339333|dbj|AB111071.1|	gi|746657054|gb|KM078954.1|	gi|908376629|gb|KT247381.1|
gi|31339335|dbj|AB111072.1|	gi|746657052|gb|KM078953.1|	gi|908376627|gb|KT247380.1|
gi|31339337|dbj|AB111073.1|	gi|746657050|gb|KM078952.1|	gi|908376625|gb|KT247379.1|
gi|31339339|dbj|AB111074.1|	gi|746657048|gb|KM078951.1|	gi|908376623|gb|KT247378.1|
gi|31339341|dbj|AB111075.1|	gi|746657046|gb|KM078950.1|	gi|1011082740|dbj|HZ468379.1|
gi|31339343|dbj|AB111076.1|	gi|746657044|gb|KM078949.1|	gi|1011082737|dbj|HZ468378.1|
gi|31339345|dbj|AB111077.1|	gi|746657042|gb|KM078948.1|	gi|1011082734|dbj|HZ468377.1|
gi|31339347|dbj|AB111078.1|	gi|746657040|gb|KM078947.1|	gi|1011082730|dbj|HZ468376.1|
gi|31339349|dbj|AB111079.1|	gi|746657038|gb|KM078946.1|	gi|1011082727|dbj|HZ468375.1|
gi|31339351|dbj|AB111080.1|	gi|746657036|gb|KM078945.1|	gi|1011082725|dbj|HZ468374.1|
gi|31339353|dbj|AB111081.1|	gi|746657034|gb|KM078944.1|	gi|1011082723|dbj|HZ468373.1|
gi|31339355|dbj|AB111082.1|	gi|746657032|gb|KM078943.1|	gi|930251532|gb|KP252142.1|
gi|31339357|dbj|AB111083.1|	gi|746657030|gb|KM078942.1|	gi|930251530|gb|KP252141.1|
gi|31339359|dbj|AB111084.1|	gi|746657028|gb|KM078941.1|	gi|1007624006|gb|KU940226.1|
gi|31339361|dbj|AB111085.1|	gi|746657026|gb|KM078940.1|	gi|1007623999|gb|KU940225.1|
gi|31339363|dbj|AB111086.1|	gi|746657024|gb|KM078939.1|	gi|770144993|gb|KP276677.1|
gi|31339365|dbj|AB111087.1|	gi|746657022|gb|KM078938.1|	gi|770144991|gb|KP276676.1|
gi|31339367|dbj|AB111088.1|	gi|746657020|gb|KM078937.1|	gi|769114137|gb|KM014696.1|
gi|31339369|dbj|AB111089.1|	gi|746657018|gb|KM078936.1|	gi|769114135|gb|KM014695.1|
gi|31339371|dbj|AB111090.1|	gi|746657016|gb|KM078935.1|	gi|769114133|gb|KM014694.1|
gi|31339373|dbj|AB111091.1|	gi|746657014|gb|KM078934.1|	gi|769114131|gb|KM014693.1|
gi|31376305|dbj|AB111448.1|	gi|746657012|gb|KM078933.1|	gi|769114129|gb|KM014692.1|
gi|31376307|dbj|AB111449.1|	gi|746657010|gb|KM078932.1|	gi|1003330347|emb|FR687348.1|
gi|31376309|dbj|AB111450.1|	gi|746657008|gb|KM078931.1|	gi|1003330344|emb|FR687347.1|
gi|31376311|dbj|AB111451.1|	gi|746657006|gb|KM078930.1|	gi|1003330341|emb|FR687346.1|
gi|31376313|dbj|AB111452.1|	gi|746657004|gb|KM078929.1|	gi|1003330338|emb|FR687345.1|
gi|31376315|dbj|AB111453.1|	gi|822599140|gb|KM851039.1|	gi|1003330335|emb|FR687344.1|
gi|31376317|dbj|AB111454.1|	gi|822599142|gb|KM851038.1|	gi|1003330332|emb|FR687343.1|
gi|51233479|dbj|AB122020.1|	gi|226377833|ref|NC_012532.1|	gi|1003330329|emb|FR687342.1|
gi|51233482|dbj|AB122021.1|	gi|735687706|gb|KJ873161.1|	gi|1003330326|emb|FR687341.1|
gi|51233484|dbj|AB122022.1|	gi|735687704|gb|KJ873160.1|	gi|1003330323|emb|FR687340.1|
gi|47716323|dbj|AB180478.1|	gi|591399175|gb|KF993678.1|	gi|971459602|emb|LN898112.1|
gi|51555869|dbj|AB188830.1|	gi|685052337|dbj|LC002520.1|	gi|971459599|emb|LN898111.1|
gi|51555871|dbj|AB188831.1|	gi|631250742|gb|KJ776791.1|	gi|971459596|emb|LN898110.1|
gi|51850370|dbj|AB189120.1|	gi|647734797|gb|KJ634273.1|	gi|971459593|emb|LN898109.1|
gi|51850372|dbj|AB189121.1|	gi|592746968|gb|KF383121.1|	gi|971459590|emb|LN898108.1|
gi|51850374|dbj|AB189122.1|	gi|592746967|gb|KF383120.1|	gi|971459587|emb|LN898107.1|
gi|51850376|dbj|AB189123.1|	gi|592746965|gb|KF383119.1|	gi|971459584|emb|LN898106.1|
gi|51850378|dbj|AB189124.1|	gi|592746963|gb|KF383118.1|	gi|971459581|emb|LN898105.1|
gi|51850380|dbj|AB189125.1|	gi|592746961|gb|KF383117.1|	gi|971459578|emb|LN898104.1|
gi|51850382|dbj|AB189126.1|	gi|592746959|gb|KF383116.1|	gi|971459575|emb|LN898103.1|
gi|51850384|dbj|AB189127.1|	gi|592746957|gb|KF383115.1|	gi|971459572|emb|LN898102.1|
gi|51850386|dbj|AB189128.1|	gi|592746955|gb|KF383114.1|	gi|971459569|emb|LN898101.1|
gi|55771291|dbj|AB194882.1|	gi|592746953|gb|KF383113.1|	gi|971459566|emb|LN898100.1|
gi|55771293|dbj|AB194883.1|	gi|592746951|gb|KF383112.1|	gi|971459563|emb|LN898099.1|
gi|55771295|dbj|AB194884.1|	gi|592746949|gb|KF383111.1|	gi|971459560|emb|LN898098.1|
gi|55771297|dbj|AB194885.1|	gi|592746947|gb|KF383110.1|	gi|971459557|emb|LN898097.1|
gi|56377323|dbj|AB195673.1|	gi|592746945|gb|KF383109.1|	gi|971459554|emb|LN898096.1|
gi|75812165|dbj|AB204803.1|	gi|592746943|gb|KF383108.1|	gi|971459551|emb|LN898095.1|
gi|82940927|dbj|AB214879.1|	gi|592746941|gb|KF383107.1|	gi|971459548|emb|LN898094.1|
gi|82940929|dbj|AB214880.1|	gi|592746939|gb|KF383106.1|	gi|971459545|emb|LN898093.1|
gi|82940931|dbj|AB214881.1|	gi|592746937|gb|KF383105.1|	gi|961468100|gb|KP702205.1|
gi|82940933|dbj|AB214882.1|	gi|592746935|gb|KF383104.1|	gi|961468092|gb|KP702204.1|
gi|86355192|dbj|AB219130.1|	gi|592746933|gb|KF383103.1|	gi|937656096|gb|KR559495.1|
gi|86355194|dbj|AB219131.1|	gi|592746931|gb|KF383102.1|	gi|937656093|gb|KR559494.1|
gi|86355196|dbj|AB219132.1|	gi|592746929|gb|KF383101.1|	gi|937656066|gb|KR559485.1|
gi|86355198|dbj|AB219133.1|	gi|592746927|gb|KF383100.1|	gi|937656060|gb|KR559483.1|
gi|86355200|dbj|AB219134.1|	gi|592746925|gb|KF383099.1|	gi|937656057|gb|KR559482.1|
gi|86355202|dbj|AB219135.1|	gi|592746923|gb|KF383098.1|	gi|937656051|gb|KR559480.1|
gi|86355204|dbj|AB219136.1|	gi|592746921|gb|KF383097.1|	gi|937656033|gb|KR559474.1|
gi|86355206|dbj|AB219137.1|	gi|592746919|gb|KF383096.1|	gi|937656021|gb|KR559470.1|
gi|86355208|dbj|AB219138.1|	gi|592746917|gb|KF383095.1|	gi|972802158|dbj|LG064797.1|
gi|86355210|dbj|AB219139.1|	gi|592746915|gb|KF383094.1|	gi|972802155|dbj|LG064796.1|
gi|73760064|dbj|AB232666.1|	gi|592746913|gb|KF383093.1|	gi|972802153|dbj|LG064795.1|
gi|302148449|dbj|AB447989.2|	gi|592746911|gb|KF383092.1|	gi|972802150|dbj|LG064794.1|
gi|254749412|dbj|AB479041.1|	gi|592746909|gb|KF383091.1|	gi|972802147|dbj|LG064793.1|
gi|254749414|dbj|AB479042.1|	gi|592746907|gb|KF383090.1|	gi|972802146|dbj|LG064792.1|
gi|257216487|dbj|AB519681.1|	gi|592746905|gb|KF383089.1|	gi|972802144|dbj|LG064791.1|
gi|308152590|dbj|AB545873.1|	gi|592746903|gb|KF383088.1|	gi|959587183|gb|KT211051.1|
gi|308152592|dbj|AB545874.1|	gi|592746901|gb|KF383087.1|	gi|959587181|gb|KT211050.1|
gi|306482250|dbj|AB549332.1|	gi|592746899|gb|KF383086.1|	gi|959587179|gb|KT211049.1|
gi|353742346|dbj|AB550408.1|	gi|592746897|gb|KF383085.1|	gi|959587177|gb|KT211048.1|
gi|353742348|dbj|AB550409.1|	gi|592746895|gb|KF383084.1|	gi|959587175|gb|KT211047.1|
gi|353742350|dbj|AB550410.1|	gi|592746894|gb|KF383083.1|	gi|959587173|gb|KT211046.1|
gi|353742352|dbj|AB550411.1|	gi|592746893|gb|KF383082.1|	gi|959587171|gb|KT211045.1|
gi|353742354|dbj|AB550412.1|	gi|592746892|gb|KF383081.1|	gi|959587169|gb|KT211044.1|
gi|353742356|dbj|AB550413.1|	gi|592746891|gb|KF383080.1|	gi|959587167|gb|KT211043.1|
gi|353742358|dbj|AB550414.1|	gi|592746890|gb|KF383079.1|	gi|959587165|gb|KT211042.1|
gi|353742360|dbj|AB550415.1|	gi|592746889|gb|KF383078.1|	gi|959587163|gb|KT211041.1|
gi|353742362|dbj|AB550416.1|	gi|592746888|gb|KF383077.1|	gi|959587161|gb|KT211040.1|
gi|353742364|dbj|AB550417.1|	gi|592746887|gb|KF383076.1|	gi|959587159|gb|KT211039.1|
gi|353742366|dbj|AB550418.1|	gi|592746886|gb|KF383075.1|	gi|959587157|gb|KT211038.1|
gi|353742368|dbj|AB550419.1|	gi|592746885|gb|KF383074.1|	gi|959587155|gb|KT211037.1|
gi|353742370|dbj|AB550420.1|	gi|592746884|gb|KF383073.1|	gi|959587153|gb|KT211036.1|
gi|353742372|dbj|AB550421.1|	gi|592746883|gb|KF383072.1|	gi|959587151|gb|KT211035.1|
gi|353742374|dbj|AB550422.1|	gi|592746882|gb|KF383071.1|	gi|959587149|gb|KT211034.1|
gi|353742376|dbj|AB550423.1|	gi|592746881|gb|KF383070.1|	gi|959587147|gb|KT211033.1|
gi|353742378|dbj|AB550424.1|	gi|592746880|gb|KF383069.1|	gi|959587145|gb|KT211032.1|
gi|353742380|dbj|AB550425.1|	gi|592746879|gb|KF383068.1|	gi|959587143|gb|KT211031.1|
gi|353742382|dbj|AB550426.1|	gi|592746878|gb|KF383067.1|	gi|959587141|gb|KT211030.1|
gi|353742384|dbj|AB550427.1|	gi|592746877|gb|KF383066.1|	gi|959587139|gb|KT211029.1|
gi|353742386|dbj|AB550428.1|	gi|592746876|gb|KF383065.1|	gi|959587137|gb|KT211028.1|
gi|353742388|dbj|AB550429.1|	gi|592746875|gb|KF383064.1|	gi|959587135|gb|KT211027.1|
gi|354952430|dbj|AB587891.1|	gi|592746874|gb|KF383063.1|	gi|959587133|gb|KT211026.1|
gi|354952432|dbj|AB587892.1|	gi|592746873|gb|KF383062.1|	gi|959587131|gb|KT211025.1|
gi|354952434|dbj|AB587893.1|	gi|592746872|gb|KF383061.1|	gi|959587129|gb|KT211024.1|
gi|354952436|dbj|AB587894.1|	gi|592746871|gb|KF383060.1|	gi|959587127|gb|KT211023.1|
gi|354952438|dbj|AB587895.1|	gi|592746870|gb|KF383059.1|	gi|966636296|gb|KT327167.2|
gi|354952440|dbj|AB587896.1|	gi|592746869|gb|KF383058.1|	gi|966636295|gb|KT327166.2|
gi|354952442|dbj|AB587897.1|	gi|592746868|gb|KF383057.1|	gi|966636294|gb|KT327165.2|
gi|354952444|dbj|AB587898.1|	gi|592746867|gb|KF383056.1|	gi|966636293|gb|KT327163.2|
gi|354952446|dbj|AB587899.1|	gi|592746866|gb|KF383055.1|	gi|908378082|gb|KT327164.1|
gi|354952448|dbj|AB587900.1|	gi|592746865|gb|KF383054.1|	gi|959241596|gb|KT581023.1|
gi|354952450|dbj|AB587901.1|	gi|592746864|gb|KF383053.1|	gi|855099081|gb|KP702297.1|
gi|354952452|dbj|AB587902.1|	gi|592746863|gb|KF383052.1|	gi|549823107|gb|KF283987.1|
gi|354952454|dbj|AB587903.1|	gi|592746862|gb|KF383051.1|	gi|549823103|gb|KF283986.1|
gi|354952456|dbj|AB587904.1|	gi|592746861|gb|KF383050.1|	gi|957741001|gb|KT336799.1|
gi|354952458|dbj|AB587905.1|	gi|592746860|gb|KF383049.1|	gi|957740999|gb|KT336798.1|
gi|354952460|dbj|AB587906.1|	gi|592746859|gb|KF383048.1|	gi|957740997|gb|KT336797.1|
gi|354952462|dbj|AB587907.1|	gi|592746858|gb|KF383047.1|	gi|957740995|gb|KT336796.1|
gi|354952464|dbj|AB587908.1|	gi|592746856|gb|KF383046.1|	gi|957740993|gb|KT336795.1|
gi|354952466|dbj|AB587909.1|	gi|592746854|gb|KF383045.1|	gi|957740991|gb|KT336794.1|
gi|354952468|dbj|AB587910.1|	gi|592746852|gb|KF383044.1|	gi|957740989|gb|KT336793.1|
gi|354952470|dbj|AB587911.1|	gi|592746850|gb|KF383043.1|	gi|957740987|gb|KT336792.1|
gi|354952472|dbj|AB587912.1|	gi|592746848|gb|KF383042.1|	gi|957740985|gb|KT336791.1|
gi|354952474|dbj|AB587913.1|	gi|592746846|gb|KF383041.1|	gi|957740983|gb|KT336790.1|
gi|354952476|dbj|AB587914.1|	gi|592746844|gb|KF383040.1|	gi|957740981|gb|KT336789.1|
gi|354952478|dbj|AB587915.1|	gi|592746842|gb|KF383039.1|	gi|957740979|gb|KT336788.1|
gi|354952480|dbj|AB587916.1|	gi|592746840|gb|KF383038.1|	gi|957740977|gb|KT336787.1|
gi|354952482|dbj|AB587917.1|	gi|592746838|gb|KF383037.1|	gi|957740975|gb|KT336786.1|
gi|354952484|dbj|AB587918.1|	gi|592746836|gb|KF383036.1|	gi|957740973|gb|KT336785.1|
gi|354952486|dbj|AB587919.1|	gi|592746834|gb|KF383035.1|	gi|957740971|gb|KT336784.1|
gi|354952488|dbj|AB587920.1|	gi|592746832|gb|KF383034.1|	gi|957740969|gb|KT336783.1|
gi|354952490|dbj|AB587921.1|	gi|592746830|gb|KF383033.1|	gi|957740966|gb|KT336782.1|
gi|354952492|dbj|AB587922.1|	gi|592746828|gb|KF383032.1|	gi|957740963|gb|KT336781.1|
gi|354952494|dbj|AB587923.1|	gi|592746826|gb|KF383031.1|	gi|957740960|gb|KT336780.1|
gi|354952496|dbj|AB587924.1|	gi|592746824|gb|KF383030.1|	gi|957740957|gb|KT336779.1|
gi|354952498|dbj|AB587925.1|	gi|592746822|gb|KF383029.1|	gi|957740954|gb|KT336778.1|
gi|354952500|dbj|AB587926.1|	gi|592746820|gb|KF383028.1|	gi|957740951|gb|KT336777.1|
gi|354952502|dbj|AB587927.1|	gi|592746818|gb|KF383027.1|	gi|256403027|dbj|AB455494.1|
gi|354952504|dbj|AB587928.1|	gi|592746816|gb|KF383026.1|	gi|256403024|dbj|AB455493.1|
gi|354952506|dbj|AB587929.1|	gi|592746814|gb|KF383025.1|	gi|954465499|gb|KR046234.1|
gi|354952508|dbj|AB587930.1|	gi|592746812|gb|KF383024.1|	gi|954465496|gb|KR046233.1|
gi|354952510|dbj|AB587931.1|	gi|592746810|gb|KF383023.1|	gi|954465493|gb|KR046232.1|
gi|354952512|dbj|AB587932.1|	gi|592746808|gb|KF383022.1|	gi|954465490|gb|KR046231.1|
gi|354952514|dbj|AB587933.1|	gi|592746806|gb|KF383021.1|	gi|954465487|gb|KR046230.1|
gi|354952516|dbj|AB587934.1|	gi|592746804|gb|KF383020.1|	gi|954465484|gb|KR046229.1|
gi|354952518|dbj|AB587935.1|	gi|592746802|gb|KF383019.1|	gi|954465481|gb|KR046228.1|
gi|354952520|dbj|AB587936.1|	gi|592746800|gb|KF383018.1|	gi|954465478|gb|KR046227.1|
gi|354952522|dbj|AB587937.1|	gi|592746798|gb|KF383017.1|	gi|937656105|gb|KR559498.1|
gi|354952524|dbj|AB587938.1|	gi|592746796|gb|KF383016.1|	gi|937656102|gb|KR559497.1|
gi|354952526|dbj|AB587939.1|	gi|592746794|gb|KF383015.1|	gi|937656099|gb|KR559496.1|
gi|354952528|dbj|AB587940.1|	gi|589387787|gb|KF270887.1|	gi|937656090|gb|KR559493.1|
gi|354952530|dbj|AB587941.1|	gi|589387785|gb|KF270886.1|	gi|937656087|gb|KR559492.1|
gi|354952532|dbj|AB587942.1|	gi|380036385|gb|JN860885.1|	gi|937656084|gb|KR559491.1|
gi|354952534|dbj|AB587943.1|	gi|345132146|gb|HQ234501.1|	gi|937656081|gb|KR559490.1|
gi|354952536|dbj|AB587944.1|	gi|345132144|gb|HQ234500.1|	gi|937656078|gb|KR559489.1|
gi|354952538|dbj|AB587945.1|	gi|345132142|gb|HQ234499.1|	gi|937656075|gb|KR559488.1|
gi|354952540|dbj|AB587946.1|	gi|345132140|gb|HQ234498.1|	gi|937656072|gb|KR559487.1|
gi|354952542|dbj|AB587947.1|	gi|2731554|gb|AF013415.1|	gi|937656069|gb|KR559486.1|
gi|354952544|dbj|AB587948.1|	gi|2731536|gb|AF013406.1|	gi|937656063|gb|KR559484.1|
gi|354952546|dbj|AB587949.1|	gi|166344034|gb|EU303241.1|	gi|937656054|gb|KR559481.1|
gi|354952548|dbj|AB587950.1|	gi|166344005|gb|EU303225.1|	gi|937656048|gb|KR559479.1|
gi|354952550|dbj|AB587951.1|	gi|226374362|gb|AY632535.2|	gi|937656045|gb|KR559478.1|
gi|354952552|dbj|AB587952.1|	gi|15192819|gb|AF372422.1|	gi|937656042|gb|KR559477.1|
gi|354952554|dbj|AB587953.1|	gi|15192799|gb|AF372412.1|	gi|937656039|gb|KR559476.1|
gi|354952556|dbj|AB587954.1|	gi|258561568|gb|DQ859064.1|	gi|937656036|gb|KR559475.1|
gi|354952558|dbj|AB587955.1|	gi|146411780|gb|DQ859059.1|	gi|937656030|gb|KR559473.1|
gi|354952560|dbj|AB587956.1|	gi|189092757|gb|EU545988.1|	gi|937656027|gb|KR559472.1|
gi|354952562|dbj|AB587957.1|		gi|937656024|gb|KR559471.1|
gi|354952564|dbj|AB587958.1|		gi|937227298|gb|KT444689.1|
gi|354952566|dbj|AB587959.1|		gi|937227296|gb|KT444688.1|
gi|354952568|dbj|AB587960.1|		gi|937227294|gb|KT444687.1|
gi|354952570|dbj|AB587961.1|		gi|937227292|gb|KT444686.1|
gi|354952572|dbj|AB587962.1|		gi|937227290|gb|KT444685.1|
gi|354952574|dbj|AB587963.1|		gi|931355145|gb|KR002040.1|
gi|354952576|dbj|AB587964.1|		gi|931219613|dbj|HW642752.1|
gi|354952578|dbj|AB587965.1|		gi|931219612|dbj|HW642751.1|
gi|354952580|dbj|AB587966.1|		gi|931219611|dbj|HW642750.1|
gi|354952582|dbj|AB587967.1|		gi|931219610|dbj|HW642749.1|
gi|354952584|dbj|AB587968.1|		gi|931219609|dbj|HW642748.1|
gi|354952586|dbj|AB587969.1|		gi|931219608|dbj|HW642747.1|
gi|354952588|dbj|AB587970.1|		gi|931219607|dbj|HW642746.1|
gi|354952590|dbj|AB587971.1|		gi|931219606|dbj|HW642745.1|
gi|354952592|dbj|AB587972.1|		gi|931219605|dbj|HW642744.1|
gi|354952594|dbj|AB587973.1|		gi|931219604|dbj|HW642743.1|
gi|354952596|dbj|AB587974.1|		gi|931219603|dbj|HW642742.1|
gi|354952598|dbj|AB587975.1|		gi|931219602|dbj|HW642741.1|
gi|354952600|dbj|AB587976.1|		gi|931219601|dbj|HW642740.1|
gi|354952602|dbj|AB587977.1|		gi|931071830|dbj|HW799204.1|
gi|354952604|dbj|AB587978.1|		gi|931071829|dbj|HW799203.1|
gi|354952606|dbj|AB587979.1|		gi|931071828|dbj|HW799202.1|
gi|354952608|dbj|AB587980.1|		gi|931071827|dbj|HW799201.1|
gi|354952610|dbj|AB587981.1|		gi|930905696|dbj|HW806808.1|
gi|354952612|dbj|AB587982.1|		gi|927217636|gb|KT449801.1|
gi|354952614|dbj|AB587983.1|		gi|906394222|gb|KR264951.1|
gi|354952616|dbj|AB587984.1|		gi|906394219|gb|KR264950.1|
gi|354952618|dbj|AB587985.1|		gi|906394216|gb|KR264949.1|
gi|354952620|dbj|AB587986.1|		gi|906358684|gb|KR818091.1|
gi|353742390|dbj|AB597966.1|		gi|564970356|gb|KC614648.1|
gi|353742392|dbj|AB597967.1|		gi|829642860|gb|KP685237.1|
gi|353742394|dbj|AB597968.1|		gi|768679038|gb|KP851710.1|
gi|353742396|dbj|AB597969.1|		gi|768679035|gb|KP851709.1|
gi|353742398|dbj|AB597970.1|		gi|777861512|gb|KP164572.1|
gi|353742400|dbj|AB597971.1|		gi|777861488|gb|KP164571.1|
gi|353742402|dbj|AB597972.1|		gi|777861470|gb|KP164570.1|
gi|353742404|dbj|AB597973.1|		gi|777861455|gb|KP164569.1|
gi|353742406|dbj|AB597974.1|		gi|777861441|gb|KP164568.1|
gi|353742408|dbj|AB597975.1|		gi|777861422|gb|KP164567.1|
gi|353742410|dbj|AB597976.1|		gi|354586958|gb|JN038571.1|
gi|353742412|dbj|AB597977.1|		gi|224589189|gb|FJ705371.1|
gi|353742414|dbj|AB597978.1|		gi|224589187|gb|FJ705370.1|
gi|353742416|dbj|AB597979.1|		gi|224589185|gb|FJ705369.1|
gi|353742418|dbj|AB597980.1|		gi|807059698|gb|KM985982.1|
gi|409924369|dbj|AB600922.1|		gi|807059696|gb|KM985981.1|
gi|409924371|dbj|AB600923.1|		gi|807059694|gb|KM985619.1|
gi|409924373|dbj|AB600924.1|		gi|801165883|gb|KP164869.1|
gi|409924375|dbj|AB600925.1|		gi|730327889|gb|KM673291.1|
gi|409924377|dbj|AB600926.1|		gi|694177233|dbj|AB857841.1|
gi|409924379|dbj|AB600927.1|		gi|694177231|dbj|AB857840.1|
gi|409924381|dbj|AB600928.1|		gi|694177229|dbj|AB857839.1|
gi|409924383|dbj|AB600929.1|		gi|694177227|dbj|AB857838.1|
gi|409924385|dbj|AB600930.1|		gi|694177225|dbj|AB857837.1|
gi|409924387|dbj|AB600931.1|		gi|694177223|dbj|AB857836.1|
gi|409924389|dbj|AB600932.1|		gi|694177221|dbj|AB857835.1|
gi|409924391|dbj|AB600933.1|		gi|694177219|dbj|AB857834.1|
gi|409924393|dbj|AB600934.1|		gi|694177217|dbj|AB857833.1|
gi|409924395|dbj|AB600935.1|		gi|694177215|dbj|AB857832.1|
gi|409924397|dbj|AB600936.1|		gi|694177213|dbj|AB857831.1|
gi|409924399|dbj|AB600937.1|		gi|694177211|dbj|AB857830.1|
gi|409924401|dbj|AB600938.1|		gi|694177209|dbj|AB857829.1|
gi|523567488|dbj|AB608786.1|		gi|694177207|dbj|AB857828.1|
gi|523567490|dbj|AB608787.1|		gi|694177205|dbj|AB857827.1|
gi|523567492|dbj|AB608788.1|		gi|694177203|dbj|AB857826.1|
gi|523567494|dbj|AB608789.1|		gi|694177201|dbj|AB857825.1|
gi|321117299|dbj|AB609588.1|		gi|694177199|dbj|AB857824.1|
gi|321117301|dbj|AB609589.1|		gi|694177197|dbj|AB857823.1|
gi|321117303|dbj|AB609590.1|		gi|694177195|dbj|AB857822.1|
gi|321117305|dbj|AB609591.1|		gi|694177193|dbj|AB857821.1|
gi|383210086|dbj|AB624553.1|		gi|694177191|dbj|AB857820.1|
gi|383210088|dbj|AB624554.1|		gi|694177189|dbj|AB857819.1|
gi|393716063|dbj|AB690858.1|		gi|694177187|dbj|AB857818.1|
gi|408357964|dbj|AB710464.1|		gi|694177185|dbj|AB857817.1|
gi|703999493|dbj|AB873104.1|		gi|694177183|dbj|AB857816.1|
gi|703999495|dbj|AB873105.1|		gi|694177181|dbj|AB857815.1|
gi|760864969|dbj|AB915366.1|		gi|694177179|dbj|AB857814.1|
gi|760864980|dbj|AB915367.1|		gi|694177177|dbj|AB857813.1|
gi|760864984|dbj|AB915368.1|		gi|694177175|dbj|AB857812.1|
gi|760864987|dbj|AB915369.1|		gi|694177173|dbj|AB857811.1|
gi|760864991|dbj|AB915370.1|		gi|694177171|dbj|AB857810.1|
gi|760864995|dbj|AB915371.1|		gi|694177169|dbj|AB857809.1|
gi|760864999|dbj|AB915372.1|		gi|694177167|dbj|AB857808.1|
gi|760865003|dbj|AB915373.1|		gi|694177165|dbj|AB857807.1|
gi|760865007|dbj|AB915374.1|		gi|694177163|dbj|AB857806.1|
gi|760865011|dbj|AB915375.1|		gi|694177161|dbj|AB857805.1|
gi|760865015|dbj|AB915376.1|		gi|694177159|dbj|AB857804.1|
gi|760865020|dbj|AB915377.1|		gi|694177157|dbj|AB857803.1|
gi|760865025|dbj|AB915378.1|		gi|694177155|dbj|AB857802.1|
gi|760865029|dbj|AB915379.1|		gi|694177153|dbj|AB857801.1|
gi|760865034|dbj|AB915380.1|		gi|694177151|dbj|AB857800.1|
gi|760865038|dbj|AB915381.1|		gi|694177149|dbj|AB857799.1|
gi|760865042|dbj|AB915382.1|		gi|694177147|dbj|AB857798.1|
gi|760865047|dbj|AB915383.1|		gi|694177145|dbj|AB857797.1|
gi|760865060|dbj|AB915384.1|		gi|694177143|dbj|AB857796.1|
gi|2199551|gb|AF004019.1|		gi|694177141|dbj|AB857795.1|
gi|2199553|gb|AF004020.1|		gi|694177139|dbj|AB857794.1|
gi|2909784|gb|AF022434.1|		gi|694177137|dbj|AB857793.1|
gi|2909786|gb|AF022435.1|		gi|694177135|dbj|AB857792.1|
gi|2909788|gb|AF022436.1|		gi|694177133|dbj|AB857791.1|
gi|2909790|gb|AF022437.1|		gi|694177131|dbj|AB857790.1|
gi|2909792|gb|AF022438.1|		gi|694177129|dbj|AB857789.1|
gi|2909794|gb|AF022439.1|		gi|694177127|dbj|AB857788.1|
gi|2909796|gb|AF022440.1|		gi|694177125|dbj|AB857787.1|
gi|2909798|gb|AF022441.1|		gi|694177123|dbj|AB857786.1|
gi|2723942|gb|AF038402.1|		gi|694177121|dbj|AB857785.1|
gi|2723944|gb|AF038403.1|		gi|694177119|dbj|AB857784.1|
gi|2911427|gb|AF046855.1|		gi|694177117|dbj|AB857783.1|
gi|2911429|gb|AF046856.1|		gi|694177115|dbj|AB857782.1|
gi|2911431|gb|AF046857.1|		gi|694177113|dbj|AB857781.1|
gi|2911433|gb|AF046858.1|		gi|694177111|dbj|AB857780.1|
gi|3777591|gb|AF093674.1|		gi|694177109|dbj|AB857779.1|
gi|4926927|gb|AF100459.1|		gi|694177107|dbj|AB857778.1|
gi|4926929|gb|AF100460.1|		gi|694177105|dbj|AB857777.1|
gi|4926931|gb|AF100461.1|		gi|694177103|dbj|AB857776.1|
gi|4926933|gb|AF100462.1|		gi|694177101|dbj|AB857775.1|
gi|4926935|gb|AF100463.1|		gi|694177099|dbj|AB857774.1|
gi|4926937|gb|AF100464.1|		gi|694177097|dbj|AB857773.1|
gi|4926939|gb|AF100465.1|		gi|694177095|dbj|AB857772.1|
gi|13386495|gb|AF100466.2|		gi|694177093|dbj|AB857771.1|
gi|4926943|gb|AF100467.1|		gi|694177091|dbj|AB857770.1|
gi|4926945|gb|AF100468.1|		gi|694177089|dbj|AB857769.1|
gi|4926947|gb|AF100469.1|		gi|694177087|dbj|AB857768.1|
gi|5007013|gb|AF147457.1|		gi|694177085|dbj|AB857767.1|
gi|5007015|gb|AF147458.1|		gi|694177083|dbj|AB857766.1|
gi|5007017|gb|AF147459.1|		gi|694177081|dbj|AB857765.1|
gi|5007019|gb|AF147460.1|		gi|694177079|dbj|AB857764.1|
gi|11036697|gb|AF163096.1|		gi|694177077|dbj|AB857763.1|
gi|6841585|gb|AF169678.1|		gi|694177075|dbj|AB857762.1|
gi|6841587|gb|AF169679.1|		gi|694177073|dbj|AB857761.1|
gi|6841589|gb|AF169680.1|		gi|694177071|dbj|AB857760.1|
gi|6841591|gb|AF169681.1|		gi|694177069|dbj|AB857759.1|
gi|6841593|gb|AF169682.1|		gi|694177067|dbj|AB857758.1|
gi|6841595|gb|AF169683.1|		gi|694177065|dbj|AB857757.1|
gi|6841597|gb|AF169684.1|		gi|694177063|dbj|AB857756.1|
gi|6841599|gb|AF169685.1|		gi|694177061|dbj|AB857755.1|
gi|6841601|gb|AF169686.1|		gi|694177059|dbj|AB857754.1|
gi|6841603|gb|AF169687.1|		gi|694177057|dbj|AB857753.1|
gi|6841605|gb|AF169688.1|		gi|694177055|dbj|AB857752.1|
gi|6110585|gb|AF187271.1|		gi|694177053|dbj|AB857751.1|
gi|6470242|gb|AF195032.1|		gi|694177051|dbj|AB857750.1|
gi|6470244|gb|AF195033.1|		gi|694177049|dbj|AB857749.1|
gi|6470246|gb|AF195034.1|		gi|694177047|dbj|AB857748.1|
gi|6470248|gb|AF195035.1|		gi|694177045|dbj|AB857747.1|
gi|6449305|gb|AF195036.1|		gi|694177043|dbj|AB857746.1|
gi|6449307|gb|AF195037.1|		gi|694177041|dbj|AB857745.1|
gi|6449309|gb|AF195038.1|		gi|694177039|dbj|AB857744.1|
gi|6449311|gb|AF195039.1|		gi|694177037|dbj|AB857743.1|
gi|6449313|gb|AF195040.1|		gi|694177035|dbj|AB857742.1|
gi|6449315|gb|AF195041.1|		gi|694177033|dbj|AB857741.1|
gi|6449317|gb|AF195042.1|		gi|694177031|dbj|AB857740.1|
gi|6449319|gb|AF195043.1|		gi|694177029|dbj|AB857739.1|
gi|6581076|gb|AF204177.1|		gi|694177027|dbj|AB857738.1|
gi|6581078|gb|AF204178.1|		gi|694177025|dbj|AB857737.1|
gi|11119731|gb|AF208496.1|		gi|694177023|dbj|AB857736.1|
gi|152032356|gb|AF226685.2|		gi|694177021|dbj|AB857735.1|
gi|8927332|gb|AF226686.1|		gi|694177019|dbj|AB857734.1|
gi|14195698|gb|AF226687.2|		gi|694177017|dbj|AB857733.1|
gi|7340167|gb|AF231715.1|		gi|694177015|dbj|AB857732.1|
gi|7340169|gb|AF231716.1|		gi|694177013|dbj|AB857731.1|
gi|7340171|gb|AF231717.1|		gi|694177011|dbj|AB857730.1|
gi|7340173|gb|AF231718.1|		gi|620989921|gb|KF151178.1|
gi|7340175|gb|AF231719.1|		gi|620989919|gb|KF151177.1|
gi|7340177|gb|AF231720.1|		gi|620989917|gb|KF151176.1|
gi|7340179|gb|AF231721.1|		gi|620989914|gb|KF151175.1|
gi|7340181|gb|AF231722.1|		gi|620989911|gb|KF151174.1|
gi|7340183|gb|AF231723.1|		gi|751956284|gb|KM923920.1|
gi|7340185|gb|AF231724.1|		gi|751956281|gb|KM923919.1|
gi|7340187|gb|AF231725.1|		gi|751956278|gb|KM923918.1|
gi|7340189|gb|AF231726.1|		gi|751956275|gb|KM923917.1|
gi|8133000|gb|AF264053.1|		gi|753347723|gb|KJ689453.1|
gi|8133002|gb|AF264054.1|		gi|753347719|gb|KJ689452.1|
gi|9280544|gb|AF276619.1|		gi|745698487|gb|KP003813.1|
gi|11096032|gb|AF289029.1|		gi|745698484|gb|KP003812.1|
gi|11596191|gb|AF295694.1|		gi|745698481|gb|KP003811.1|
gi|11596193|gb|AF295695.1|		gi|745698478|gb|KP003810.1|
gi|11596195|gb|AF295696.1|		gi|745698475|gb|KP003809.1|
gi|11596197|gb|AF295697.1|		gi|745698472|gb|KP003808.1|
gi|11596199|gb|AF295698.1|		gi|745698469|gb|KP003807.1|
gi|11596201|gb|AF295699.1|		gi|578897399|gb|KF818475.1|
gi|11596203|gb|AF295700.1|		gi|578897397|gb|KF818474.1|
gi|10945572|gb|AF297004.1|		gi|578897395|gb|KF818473.1|
gi|10945574|gb|AF297005.1|		gi|578897393|gb|KF818472.1|
gi|10945576|gb|AF297006.1|		gi|404436143|gb|JX276650.1|
gi|10945578|gb|AF297007.1|		gi|404436141|gb|JX276649.1|
gi|10945580|gb|AF297008.1|		gi|404436139|gb|JX276648.1|
gi|10945582|gb|AF297009.1|		gi|404436137|gb|JX276647.1|
gi|14328929|gb|AF298807.1|		gi|404436135|gb|JX276646.1|
gi|14328931|gb|AF298808.1|		gi|404436133|gb|JX276645.1|
gi|14485523|gb|AF309641.1|		gi|399163198|gb|JX442968.1|
gi|24417515|gb|AF311956.1|		gi|399163196|gb|JX442967.1|
gi|24417517|gb|AF311957.1|		gi|399163194|gb|JX442966.1|
gi|24417519|gb|AF311958.1|		gi|399163192|gb|JX442965.1|
gi|12711599|gb|AF317645.1|		gi|399163190|gb|JX442964.1|
gi|12659201|gb|AF326573.1|		gi|399163188|gb|JX442963.1|
gi|13540386|gb|AF350498.1|		gi|399163186|gb|JX442962.1|
gi|13926152|gb|AF359579.1|		gi|399163184|gb|JX442961.1|
gi|18644129|gb|AF363069.1|		gi|399163182|gb|JX442960.1|
gi|18644131|gb|AF363070.1|		gi|399163180|gb|JX442959.1|
gi|18644133|gb|AF363071.1|		gi|698268133|gb|KJ939333.1|
gi|18644135|gb|AF363072.1|		gi|639463850|gb|KJ579187.1|
gi|18644137|gb|AF363073.1|		gi|639463847|gb|KJ579186.1|
gi|18644139|gb|AF363074.1|		gi|639463844|gb|KJ579185.1|
gi|18644141|gb|AF363075.1|		gi|639463841|gb|KJ579184.1|
gi|18644143|gb|AF363076.1|		gi|684770495|emb|JC739988.1|
gi|18644145|gb|AF363077.1|		gi|684770494|emb|JC739987.1|
gi|18644147|gb|AF363078.1|		gi|684770493|emb|JC739985.1|
gi|18644149|gb|AF363079.1|		gi|684770492|emb|JC739983.1|
gi|18644151|gb|AF363080.1|		gi|684770491|emb|JC739979.1|
gi|18644153|gb|AF363081.1|		gi|684770490|emb|JC739977.1|
gi|18644155|gb|AF363082.1|		gi|684770486|emb|JC739969.1|
gi|18644157|gb|AF363083.1|		gi|615794507|gb|KJ451624.1|
gi|18644159|gb|AF363084.1|		gi|615794504|gb|KJ451623.1|
gi|18644161|gb|AF363085.1|		gi|615794500|gb|KJ451622.1|
gi|18644163|gb|AF363086.1|		gi|674268621|gb|KF590567.1|
gi|18644165|gb|AF363087.1|		gi|674268618|gb|KF590566.1|
gi|18644167|gb|AF363088.1|		gi|674268615|gb|KF590565.1|
gi|18644169|gb|AF363089.1|		gi|674268612|gb|KF590564.1|
gi|18644171|gb|AF363090.1|		gi|664818218|gb|KJ941050.1|
gi|18644173|gb|AF363091.1|		gi|629510202|dbj|AB860301.3|
gi|18644175|gb|AF363092.1|		gi|659902278|gb|KJ679578.1|
gi|18378347|gb|AF398106.1|		gi|659902275|gb|KJ679577.1|
gi|18378349|gb|AF398107.1|		gi|655168290|gb|KJ796852.1|
gi|18378351|gb|AF398108.1|		gi|655168288|gb|KJ796851.1|
gi|18378353|gb|AF398109.1|		gi|655168286|gb|KJ796850.1|
gi|18378355|gb|AF398110.1|		gi|655168284|gb|KJ796849.1|
gi|18378357|gb|AF398111.1|		gi|655168282|gb|KJ796848.1|
gi|18378359|gb|AF398112.1|		gi|655168280|gb|KJ796847.1|
gi|18378361|gb|AF398113.1|		gi|655168278|gb|KJ796846.1|
gi|18378363|gb|AF398114.1|		gi|655168276|gb|KJ796845.1|
gi|21693180|gb|AF410345.1|		gi|655168274|gb|KJ796844.1|
gi|21693182|gb|AF410346.1|		gi|369830796|gb|JQ065892.1|
gi|21693184|gb|AF410347.1|		gi|369830793|gb|JQ065891.1|
gi|21693188|gb|AF410349.1|		gi|369830790|gb|JQ065890.1|
gi|21693190|gb|AF410350.1|		gi|369830787|gb|JQ065889.1|
gi|21693192|gb|AF410351.1|		gi|369830784|gb|JQ065888.1|
gi|21693194|gb|AF410352.1|		gi|369830781|gb|JQ065887.1|
gi|21693196|gb|AF410353.1|		gi|369830778|gb|JQ065886.1|
gi|21693198|gb|AF410354.1|		gi|369830774|gb|JQ065885.1|
gi|21693200|gb|AF410355.1|		gi|389619428|gb|JN661156.1|
gi|21693202|gb|AF410356.1|		gi|389619426|gb|JN661155.1|
gi|21693204|gb|AF410357.1|		gi|389619424|gb|JN661154.1|
gi|21693208|gb|AF410359.1|		gi|389619422|gb|JN661153.1|
gi|21693210|gb|AF410360.1|		gi|389619420|gb|JN661152.1|
gi|21693222|gb|AF410366.1|		gi|389619418|gb|JN661151.1|
gi|21693224|gb|AF410367.1|		gi|389619416|gb|JN661150.1|
gi|21693226|gb|AF410368.1|		gi|389619414|gb|JN661149.1|
gi|21693228|gb|AF410369.1|		gi|389619412|gb|JN661148.1|
gi|21693230|gb|AF410370.1|		gi|583158498|gb|KF872195.1|
gi|21693232|gb|AF410371.1|		gi|572167713|gb|KF425514.1|
gi|21693234|gb|AF410372.1|		gi|541987890|gb|KF318729.1|
gi|21693236|gb|AF410373.1|		gi|564131985|gb|KF578462.1|
gi|21693238|gb|AF410374.1|		gi|564131983|gb|KF578461.1|
gi|21693240|gb|AF410375.1|		gi|564131981|gb|KF578460.1|
gi|21693242|gb|AF410376.1|		gi|564131979|gb|KF578459.1|
gi|21693244|gb|AF410377.1|		gi|564131977|gb|KF578458.1|
gi|21693246|gb|AF410378.1|		gi|564131975|gb|KF578457.1|
gi|21693248|gb|AF410379.1|		gi|558754401|gb|KC879578.1|
gi|23451568|gb|AF425609.1|		gi|558754399|gb|KC879577.1|
gi|23451570|gb|AF425610.1|		gi|558754397|gb|KC879576.1|
gi|23451572|gb|AF425611.1|		gi|558754395|gb|KC879575.1|
gi|23451574|gb|AF425612.1|		gi|558754393|gb|KC879574.1|
gi|23451576|gb|AF425613.1|		gi|558754391|gb|KC879573.1|
gi|23451578|gb|AF425614.1|		gi|558754389|gb|KC879572.1|
gi|23451580|gb|AF425615.1|		gi|558754387|gb|KC879571.1|
gi|23451582|gb|AF425616.1|		gi|558754385|gb|KC879570.1|
gi|23451584|gb|AF425617.1|		gi|558754383|gb|KC879569.1|
gi|23451586|gb|AF425618.1|		gi|558754381|gb|KC879568.1|
gi|23451588|gb|AF425619.1|		gi|558754379|gb|KC879567.1|
gi|23451590|gb|AF425620.1|		gi|558754377|gb|KC879566.1|
gi|23451592|gb|AF425621.1|		gi|558754375|gb|KC879565.1|
gi|23451594|gb|AF425622.1|		gi|558754373|gb|KC879564.1|
gi|23451596|gb|AF425623.1|		gi|558754371|gb|KC879563.1|
gi|23451598|gb|AF425624.1|		gi|558754369|gb|KC879562.1|
gi|23451600|gb|AF425625.1|		gi|558754367|gb|KC879561.1|
gi|23451602|gb|AF425626.1|		gi|558754365|gb|KC879560.1|
gi|23451604|gb|AF425627.1|		gi|558754363|gb|KC879559.1|
gi|23451606|gb|AF425628.1|		gi|540357477|gb|KC810970.1|
gi|23451608|gb|AF425629.1|		gi|546196789|dbj|HW249835.1|
gi|23451610|gb|AF425630.1|		gi|546196726|dbj|HW249788.1|
gi|23451612|gb|AF425631.1|		gi|546196724|dbj|HW249787.1|
gi|23451614|gb|AF425632.1|		gi|546196722|dbj|HW249786.1|
gi|23451616|gb|AF425633.1|		gi|546196721|dbj|HW249785.1|
gi|23451618|gb|AF425634.1|		gi|546196719|dbj|HW249784.1|
gi|23451620|gb|AF425635.1|		gi|546196717|dbj|HW249783.1|
gi|23451622|gb|AF425636.1|		gi|546196716|dbj|HW249782.1|
gi|23451624|gb|AF425637.1|		gi|546196714|dbj|HW249781.1|
gi|23451626|gb|AF425638.1|		gi|546196712|dbj|HW249780.1|
gi|23451628|gb|AF425639.1|		gi|546196710|dbj|HW249779.1|
gi|32364765|gb|AF426110.1|		gi|546196709|dbj|HW249778.1|
gi|32364767|gb|AF426111.1|		gi|546196707|dbj|HW249777.1|
gi|32364769|gb|AF426112.1|		gi|546196706|dbj|HW249776.1|
gi|32364771|gb|AF426113.1|		gi|546196704|dbj|HW249775.1|
gi|32364773|gb|AF426114.1|		gi|542079782|gb|KC731586.1|
gi|32364775|gb|AF426115.1|		gi|542079780|gb|KC731585.1|
gi|32364777|gb|AF426116.1|		gi|542079778|gb|KC731584.1|
gi|32364779|gb|AF426117.1|		gi|542079776|gb|KC731583.1|
gi|32364781|gb|AF426118.1|		gi|542079774|gb|KC731582.1|
gi|32364783|gb|AF426119.1|		gi|542079772|gb|KC731581.1|
gi|32364785|gb|AF426120.1|		gi|538281038|gb|KC285194.1|
gi|32364787|gb|AF426121.1|		gi|538281022|gb|KC285193.1|
gi|32364789|gb|AF426122.1|		gi|538281013|gb|KC285192.1|
gi|32364791|gb|AF426123.1|		gi|538281003|gb|KC285191.1|
gi|32364793|gb|AF426124.1|		gi|538280992|gb|KC285190.1|
gi|32364795|gb|AF426125.1|		gi|538280988|gb|KC285189.1|
gi|32364797|gb|AF426126.1|		gi|530539702|gb|KC862329.1|
gi|32364799|gb|AF426127.1|		gi|528881447|emb|HE578162.1|
gi|32364801|gb|AF426128.1|		gi|399163208|gb|JN981133.1|
gi|32364803|gb|AF426129.1|		gi|399163206|gb|JN981132.1|
gi|32364805|gb|AF426130.1|		gi|399163204|gb|JN981131.1|
gi|32364807|gb|AF426131.1|		gi|399163202|gb|JN981130.1|
gi|18034618|gb|AF455276.1|		gi|399163200|gb|JN981129.1|
gi|18072076|gb|AF457574.1|		gi|402234658|gb|JX026956.1|
gi|18766554|gb|AF469175.1|		gi|402234656|gb|JX026955.1|
gi|18766556|gb|AF469176.1|		gi|340343915|gb|HQ846359.1|
gi|28194234|gb|AF472274.1|		gi|340343912|gb|HQ846358.1|
gi|28194236|gb|AF472275.1|		gi|340343909|gb|HQ846357.1|
gi|28194238|gb|AF472276.1|		gi|340343906|gb|HQ846356.1|
gi|28194240|gb|AF472277.1|		gi|507721835|gb|KC969208.1|
gi|19744844|gb|AF489932.1|		gi|507721833|gb|KC969207.1|
gi|20147558|gb|AF493075.1|		gi|484265149|emb|JB160222.1|
gi|21070436|gb|AF509530.1|		gi|484265148|emb|JB160221.1|
gi|27656962|gb|AF513110.1|		gi|484265147|emb|JB160220.1|
gi|28927653|gb|AF514876.3|		gi|484265146|emb|JB160219.1|
gi|27316962|gb|AF514878.2|		gi|484265145|emb|JB160218.1|
gi|28927656|gb|AF514883.2|		gi|484265143|emb|JB160217.1|
gi|28927655|gb|AF514885.3|		gi|484265142|emb|JB160209.1|
gi|27368029|gb|AF514889.3|		gi|484265141|emb|JB160208.1|
gi|22417216|gb|AF533079.1|		gi|484265140|emb|JB160207.1|
gi|37545145|gb|AH011663.1|SEG_AY099338S		gi|484265139|emb|JB160206.1|
gi|37545151|gb|AH011664.1|SEG_AY099339S		gi|484265138|emb|JB160205.1|
gi|37545156|gb|AH011665.1|SEG_AY099340S		gi|484265137|emb|JB160204.1|
gi|37545161|gb|AH011666.1|SEG_AY099341S		gi|484265136|emb|JB160203.1|
gi|37545166|gb|AH011667.1|SEG_AY099342S		gi|480359394|gb|KC488650.1|
gi|28170805|gb|AH011951.1|SEG_AY152036S		gi|478580140|emb|JB138056.1|
gi|28170814|gb|AH011952.1|SEG_AY152040S		gi|478580139|emb|JB138055.1|
gi|28170823|gb|AH011953.1|SEG_AY152044S		gi|478580138|emb|JB138054.1|
gi|28170832|gb|AH011954.1|SEG_AY152048S		gi|478580137|emb|JB138053.1|
gi|28170841|gb|AH011955.1|SEG_AY152052S		gi|478580136|emb|JB138052.1|
gi|28170850|gb|AH011956.1|SEG_AY152056S		gi|478580135|emb|JB138051.1|
gi|28170859|gb|AH011957.1|SEG_AY152060S		gi|478580134|emb|JB138050.1|
gi|28170868|gb|AH011958.1|SEG_AY152064S		gi|478580133|emb|JB138049.1|
gi|28170877|gb|AH011959.1|SEG_AY152068S		gi|478580132|emb|JB138048.1|
gi|28170886|gb|AH011960.1|SEG_AY152072S		gi|478580131|emb|JB138047.1|
gi|28170895|gb|AH011961.1|SEG_AY152076S		gi|478580130|emb|JB138046.1|
gi|28170904|gb|AH011962.1|SEG_AY152080S		gi|385250687|dbj|AB678695.1|
gi|28170913|gb|AH011963.1|SEG_AY152084S		gi|385250685|dbj|AB678694.1|
gi|28170922|gb|AH011964.1|SEG_AY152088S		gi|385250683|dbj|AB678693.1|
gi|28170931|gb|AH011965.1|SEG_AY152092S		gi|385250681|dbj|AB678692.1|
gi|28170940|gb|AH011966.1|SEG_AY152096S		gi|385250679|dbj|AB678691.1|
gi|28170949|gb|AH011967.1|SEG_AY152100S		gi|385250677|dbj|AB678690.1|
gi|28170958|gb|AH011968.1|SEG_AY152104S		gi|385250675|dbj|AB678689.1|
gi|28170967|gb|AH011969.1|SEG_AY152108S		gi|385250673|dbj|AB678688.1|
gi|28170976|gb|AH011970.1|SEG_AY152112S		gi|385250671|dbj|AB678687.1|
gi|28170985|gb|AH011971.1|SEG_AY152116S		gi|385250669|dbj|AB678686.1|
gi|28170994|gb|AH011972.1|SEG_AY152120S		gi|385250667|dbj|AB678685.1|
gi|28171003|gb|AH011973.1|SEG_AY152124S		gi|385250665|dbj|AB678684.1|
gi|28171012|gb|AH011974.1|SEG_AY152128S		gi|385250663|dbj|AB678683.1|
gi|28171021|gb|AH011975.1|SEG_AY152132S		gi|385250661|dbj|AB678682.1|
gi|28171030|gb|AH011976.1|SEG_AY152136S		gi|385250659|dbj|AB678681.1|
gi|28171039|gb|AH011977.1|SEG_AY152140S		gi|385250657|dbj|AB678680.1|
gi|28171048|gb|AH011978.1|SEG_AY152144S		gi|385250655|dbj|AB678679.1|
gi|28171057|gb|AH011979.1|SEG_AY152148S		gi|385250653|dbj|AB678678.1|
gi|28171066|gb|AH011980.1|SEG_AY152152S		gi|385250651|dbj|AB678677.1|
gi|28171075|gb|AH011981.1|SEG_AY152156S		gi|469615206|gb|KC352904.1|
gi|28171084|gb|AH011982.1|SEG_AY152160S		gi|448992754|emb|JA879211.1|
gi|28171093|gb|AH011983.1|SEG_AY152164S		gi|448992707|emb|JA879140.1|
gi|28171102|gb|AH011984.1|SEG_AY152168S		gi|448992706|emb|JA879139.1|
gi|28171111|gb|AH011985.1|SEG_AY152172S		gi|448992705|emb|JA879138.1|
gi|28171120|gb|AH011986.1|SEG_AY152176S		gi|448992704|emb|JA879137.1|
gi|28171129|gb|AH011987.1|SEG_AY152180S		gi|448992703|emb|JA879136.1|
gi|28171138|gb|AH011988.1|SEG_AY152184S		gi|448992702|emb|JA879135.1|
gi|28171147|gb|AH011989.1|SEG_AY152188S		gi|448992701|emb|JA879134.1|
gi|28171156|gb|AH011990.1|SEG_AY152192S		gi|448992700|emb|JA879133.1|
gi|28171165|gb|AH011991.1|SEG_AY152196S		gi|448992699|emb|JA879132.1|
gi|28171174|gb|AH011992.1|SEG_AY152200S		gi|448992698|emb|JA879131.1|
gi|28171183|gb|AH011993.1|SEG_AY152204S		gi|448992697|emb|JA879130.1|
gi|28171192|gb|AH011994.1|SEG_AY152208S		gi|448992696|emb|JA879129.1|
gi|28171201|gb|AH011995.1|SEG_AY152212S		gi|448992695|emb|JA879128.1|
gi|28171210|gb|AH011996.1|SEG_AY152216S		gi|448992694|emb|JA879127.1|
gi|28171219|gb|AH011997.1|SEG_AY152220S		gi|371985836|gb|JN558836.1|
gi|28171228|gb|AH011998.1|SEG_AY152224S		gi|371985833|gb|JN558835.1|
gi|28171237|gb|AH011999.1|SEG_AY152228S		gi|371985830|gb|JN558834.1|
gi|28171246|gb|AH012000.1|SEG_AY152232S		gi|315435271|gb|GU365865.1|
gi|28171255|gb|AH012001.1|SEG_AY152236S		gi|315435269|gb|GU365864.1|
gi|28171264|gb|AH012002.1|SEG_AY152240S		gi|315435267|gb|GU365863.1|
gi|28171273|gb|AH012003.1|SEG_AY152244S		gi|315435265|gb|GU365862.1|
gi|28171282|gb|AH012004.1|SEG_AY152248S		gi|429324006|emb|FN295483.3|
gi|28171291|gb|AH012005.1|SEG_AY152252S		gi|429324003|emb|FN295485.3|
gi|28171300|gb|AH012006.1|SEG_AY152256S		gi|429323998|emb|FN295487.2|
gi|28171309|gb|AH012007.1|SEG_AY152260S		gi|429323995|emb|FN295484.2|
gi|28171318|gb|AH012008.1|SEG_AY152264S		gi|390985690|gb|JQ861260.1|
gi|28171327|gb|AH012009.1|SEG_AY152268S		gi|390985687|gb|JQ861259.1|
gi|28171336|gb|AH012010.1|SEG_AY152272S		gi|390985684|gb|JQ861258.1|
gi|28171345|gb|AH012011.1|SEG_AY152276S		gi|390985681|gb|JQ861257.1|
gi|28171354|gb|AH012012.1|SEG_AY152280S		gi|390985678|gb|JQ861256.1|
gi|28171363|gb|AH012013.1|SEG_AY152284S		gi|390985675|gb|JQ861255.1|
gi|28171372|gb|AH012014.1|SEG_AY152288S		gi|390985672|gb|JQ861254.1|
gi|28171381|gb|AH012015.1|SEG_AY152292S		gi|390985669|gb|JQ861253.1|
gi|28171390|gb|AH012016.1|SEG_AY152296S		gi|428670855|emb|HE806461.1|
gi|28171399|gb|AH012017.1|SEG_AY152300S		gi|410067119|emb|FR717337.1|
gi|28171408|gb|AH012018.1|SEG_AY152304S		gi|410067116|emb|FR717336.1|
gi|28171417|gb|AH012019.1|SEG_AY152308S		gi|422036432|gb|JX839829.1|
gi|28171426|gb|AH012020.1|SEG_AY152312S		gi|422036430|gb|JX839828.1|
gi|28171435|gb|AH012021.1|SEG_AY152316S		gi|422036428|gb|JX839827.1|
gi|28171444|gb|AH012022.1|SEG_AY152320S		gi|422036426|gb|JX839826.1|
gi|28171453|gb|AH012023.1|SEG_AY152324S		gi|422036424|gb|JX839825.1|
gi|28171462|gb|AH012024.1|SEG_AY152328S		gi|422036422|gb|JX839824.1|
gi|28171471|gb|AH012025.1|SEG_AY152332S		gi|422036420|gb|JX839823.1|
gi|28171480|gb|AH012026.1|SEG_AY152336S		gi|422036418|gb|JX839822.1|
gi|28171489|gb|AH012027.1|SEG_AY152340S		gi|422036416|gb|JX839821.1|
gi|28171498|gb|AH012028.1|SEG_AY152344S		gi|422036414|gb|JX839820.1|
gi|28171507|gb|AH012029.1|SEG_AY152348S		gi|422036412|gb|JX839819.1|
gi|28171516|gb|AH012030.1|SEG_AY152352S		gi|422036410|gb|JX839818.1|
gi|28171525|gb|AH012031.1|SEG_AY152356S		gi|422036408|gb|JX839817.1|
gi|28171534|gb|AH012032.1|SEG_AY152360S		gi|422036406|gb|JX839816.1|
gi|46949385|gb|AH013794.1|SEG_AY538627S		gi|422036404|gb|JX839815.1|
gi|17426822|emb|AJ421524.1|		gi|422036402|gb|JX839814.1|
gi|23304738|emb|AJ428556.1|		gi|422036400|gb|JX839813.1|
gi|23304740|emb|AJ428557.1|		gi|422036398|gb|JX839812.1|
gi|23304742|emb|AJ428558.1|		gi|422036396|gb|JX839811.1|
gi|23304744|emb|AJ428559.1|		gi|422036394|gb|JX839810.1|
gi|23304746|emb|AJ428560.1|		gi|422036392|gb|JX839809.1|
gi|19682831|emb|AJ438941.1|		gi|422036390|gb|JX839808.1|
gi|40643330|emb|AJ487271.1|		gi|422036388|gb|JX839807.1|
gi|146188914|emb|AJ968413.1|		gi|422036386|gb|JX839806.1|
gi|189086014|emb|AM746212.1|		gi|422036384|gb|JX839805.1|
gi|189086016|emb|AM746213.1|		gi|422036382|gb|JX839804.1|
gi|189086018|emb|AM746214.1|		gi|422036380|gb|JX839803.1|
gi|189086020|emb|AM746215.1|		gi|422036378|gb|JX839802.1|
gi|189086022|emb|AM746216.1|		gi|422036376|gb|JX839801.1|
gi|189086024|emb|AM746217.1|		gi|422036374|gb|JX839800.1|
gi|189086026|emb|AM746218.1|		gi|422036372|gb|JX839799.1|
gi|189086028|emb|AM746219.1|		gi|422036370|gb|JX839798.1|
gi|189086030|emb|AM746220.1|		gi|422036368|gb|JX839797.1|
gi|189086032|emb|AM746221.1|		gi|422036366|gb|JX839796.1|
gi|189086034|emb|AM746222.1|		gi|422036364|gb|JX839795.1|
gi|189086036|emb|AM746223.1|		gi|422036362|gb|JX839794.1|
gi|189086038|emb|AM746224.1|		gi|422036360|gb|JX839793.1|
gi|189086040|emb|AM746225.1|		gi|422036358|gb|JX839792.1|
gi|189086042|emb|AM746226.1|		gi|422036356|gb|JX839791.1|
gi|189086044|emb|AM746227.1|		gi|422036354|gb|JX839790.1|
gi|189086046|emb|AM746228.1|		gi|422036352|gb|JX839789.1|
gi|189086048|emb|AM746229.1|		gi|422036350|gb|JX839788.1|
gi|189086050|emb|AM746230.1|		gi|422036348|gb|JX839787.1|
gi|189086052|emb|AM746231.1|		gi|422036346|gb|JX839786.1|
gi|189086054|emb|AM746232.1|		gi|422036344|gb|JX839785.1|
gi|12310764|emb|AX058264.1|		gi|422036342|gb|JX839784.1|
gi|32693419|emb|AX775700.1|		gi|422036340|gb|JX839783.1|
gi|32693421|emb|AX775702.1|		gi|422036338|gb|JX839782.1|
gi|32693423|emb|AX775704.1|		gi|422036336|gb|JX839781.1|
gi|14585842|gb|AY037116.1|		gi|422036334|gb|JX839780.1|
gi|15020265|gb|AY038605.1|		gi|422036332|gb|JX839779.1|
gi|18643733|gb|AY044442.1|		gi|422036330|gb|JX839778.1|
gi|19547900|gb|AY079423.1|		gi|422036328|gb|JX839777.1|
gi|19547901|gb|AY079424.1|		gi|422036326|gb|JX839776.1|
gi|20135603|gb|AY089979.1|		gi|422036324|gb|JX839775.1|
gi|20135605|gb|AY089980.1|		gi|422036322|gb|JX839774.1|
gi|37543955|gb|AY099336.1|		gi|422036320|gb|JX839773.1|
gi|37543957|gb|AY099337.1|		gi|422036318|gb|JX839772.1|
gi|37545146|gb|AY099338.1|AY099338S1		gi|422036316|gb|JX839771.1|
gi|37545152|gb|AY099339.1|AY099339S1		gi|422036314|gb|JX839770.1|
gi|37545157|gb|AY099340.1|AY099340S1		gi|422036312|gb|JX839769.1|
gi|37545162|gb|AY099341.1|AY099341S1		gi|422036310|gb|JX839768.1|
gi|37545167|gb|AY099342.1|AY099342S1		gi|422036308|gb|JX839767.1|
gi|37545147|gb|AY099343.1|AY099338S2		gi|422036306|gb|JX839766.1|
gi|37545153|gb|AY099344.1|AY099339S2		gi|326902023|gb|JF274082.1|
gi|37545158|gb|AY099345.1|AY099340S2		gi|325975286|gb|JF272476.1|
gi|37545163|gb|AY099346.1|AY099341S2		gi|325975284|gb|JF272475.1|
gi|37545168|gb|AY099347.1|AY099342S2		gi|325975282|gb|JF272474.1|
gi|23320782|gb|AY135419.1|		gi|325975280|gb|JF272473.1|
gi|24559852|gb|AY145712.1|		gi|27754751|ref|NC
gi|24559854|gb|AY145713.1|		gi|399240871|gb|JX088705.1|
gi|24559856|gb|AY145714.1|		gi|312162135|gb|HM067744.1|
gi|24559858|gb|AY145715.1|		gi|312162133|gb|HM067743.1|
gi|24559860|gb|AY145716.1|		gi|339896311|gb|HQ848081.1|
gi|24559862|gb|AY145717.1|		gi|339896308|gb|HQ848080.1|
gi|24559864|gb|AY145718.1|		gi|394309489|gb|JQ943720.1|
gi|24559866|gb|AY145719.1|		gi|394309487|gb|JQ943719.1|
gi|24559868|gb|AY145720.1|		gi|394309485|gb|JQ943718.1|
gi|24559870|gb|AY145721.1|		gi|394309483|gb|JQ943717.1|
gi|24559872|gb|AY145722.1|		gi|394309481|gb|JQ943716.1|
gi|24559874|gb|AY145723.1|		gi|394309479|gb|JQ943715.1|
gi|24559876|gb|AY145724.1|		gi|394309477|gb|JQ943714.1|
gi|24559878|gb|AY145725.1|		gi|394309475|gb|JQ943713.1|
gi|24559880|gb|AY145726.1|		gi|394309473|gb|JQ943712.1|
gi|24559882|gb|AY145727.1|		gi|394309471|gb|JQ943711.1|
gi|24559884|gb|AY145728.1|		gi|394309469|gb|JQ943710.1|
gi|24559886|gb|AY145729.1|		gi|394309467|gb|JQ943709.1|
gi|24559888|gb|AY145730.1|		gi|394309465|gb|JQ943708.1|
gi|31376210|gb|AY146761.1|		gi|394309463|gb|JQ943707.1|
gi|31376212|gb|AY146762.1|		gi|394309461|gb|JQ943706.1|
gi|31376214|gb|AY146763.1|		gi|394309459|gb|JQ943705.1|
gi|31376216|gb|AY146764.1|		gi|394309457|gb|JQ943704.1|
gi|31376218|gb|AY146765.1|		gi|394309455|gb|JQ943703.1|
gi|31376220|gb|AY146766.1|		gi|394309453|gb|JQ943702.1|
gi|31376222|gb|AY146767.1|		gi|394309451|gb|JQ943701.1|
gi|31376224|gb|AY146768.1|		gi|394309449|gb|JQ943700.1|
gi|31376226|gb|AY146769.1|		gi|394309447|gb|JQ943699.1|
gi|31376228|gb|AY146770.1|		gi|394309445|gb|JQ943698.1|
gi|31376230|gb|AY146771.1|		gi|394309444|gb|JQ943697.1|
gi|31376232|gb|AY146772.1|		gi|394309442|gb|JQ943696.1|
gi|31376234|gb|AY146773.1|		gi|394309440|gb|JQ943695.1|
gi|31376236|gb|AY146774.1|		gi|394309438|gb|JQ943694.1|
gi|31376238|gb|AY146775.1|		gi|394309436|gb|JQ943693.1|
gi|31376240|gb|AY146776.1|		gi|394309434|gb|JQ943692.1|
gi|31376242|gb|AY146777.1|		gi|394309432|gb|JQ943691.1|
gi|31376244|gb|AY146778.1|		gi|394309430|gb|JQ943690.1|
gi|28170806|gb|AY152036.1|AY152036S1		gi|394309428|gb|JQ943689.1|
gi|28170815|gb|AY152040.1|AY152040S1		gi|394309426|gb|JQ943688.1|
gi|28170824|gb|AY152044.1|AY152044S1		gi|394309424|gb|JQ943687.1|
gi|28170833|gb|AY152048.1|AY152048S1		gi|332356367|gb|HQ542229.1|
gi|28170842|gb|AY152052.1|AY152052S1		gi|373878065|gb|JF264892.1|
gi|28170851|gb|AY152056.1|AY152056S1		gi|373878063|gb|JF264891.1|
gi|28170860|gb|AY152060.1|AY152060S1		gi|373878061|gb|JF264890.1|
gi|28170869|gb|AY152064.1|AY152064S1		gi|359358846|gb|HQ702750.1|
gi|28170878|gb|AY152068.1|AY152068S1		gi|325295757|gb|HM038418.1|
gi|28170887|gb|AY152072.1|AY152072S1		gi|380467950|gb|JQ067624.1|
gi|28170896|gb|AY152076.1|AY152076S1		gi|332348457|gb|HM159390.1|
gi|28170905|gb|AY152080.1|AY152080S1		gi|332348455|gb|HM159389.1|
gi|28170914|gb|AY152084.1|AY152084S1		gi|332348453|gb|HM159388.1|
gi|28170923|gb|AY152088.1|AY152088S1		gi|332348451|gb|HM159387.1|
gi|28170932|gb|AY152092.1|AY152092S1		gi|332348449|gb|HM159386.1|
gi|28170941|gb|AY152096.1|AY152096S1		gi|332348447|gb|HM159385.1|
gi|28170950|gb|AY152100.1|AY152100S1		gi|332348445|gb|HM159384.1|
gi|28170959|gb|AY152104.1|AY152104S1		gi|317470179|gb|GU434112.1|
gi|28170968|gb|AY152108.1|AY152108S1		gi|317470177|gb|GU434111.1|
gi|28170977|gb|AY152112.1|AY152112S1		gi|317470175|gb|GU434110.1|
gi|28170986|gb|AY152116.1|AY152116S1		gi|317470173|gb|GU434109.1|
gi|28170995|gb|AY152120.1|AY152120S1		gi|317470171|gb|GU434108.1|
gi|28171004|gb|AY152124.1|AY152124S1		gi|317470169|gb|GU434107.1|
gi|28171013|gb|AY152128.1|AY152128S1		gi|317470167|gb|GU434106.1|
gi|28171022|gb|AY152132.1|AY152132S1		gi|317470165|gb|GU434105.1|
gi|28171031|gb|AY152136.1|AY152136S1		gi|317470163|gb|GU434104.1|
gi|28171040|gb|AY152140.1|AY152140S1		gi|317470161|gb|GU434103.1|
gi|28171049|gb|AY152144.1|AY152144S1		gi|317470159|gb|GU434102.1|
gi|28171058|gb|AY152148.1|AY152148S1		gi|317470157|gb|GU434101.1|
gi|28171067|gb|AY152152.1|AY152152S1		gi|270311617|gb|GU189061.1|
gi|28171076|gb|AY152156.1|AY152156S1		gi|296124591|gb|HM045823.1|
gi|28171085|gb|AY152160.1|AY152160S1		gi|296124588|gb|HM045822.1|
gi|28171094|gb|AY152164.1|AY152164S1		gi|296124585|gb|HM045821.1|
gi|28171103|gb|AY152168.1|AY152168S1		gi|296124582|gb|HM045820.1|
gi|28171112|gb|AY152172.1|AY152172S1		gi|296124579|gb|HM045819.1|
gi|28171121|gb|AY152176.1|AY152176S1		gi|296124576|gb|HM045818.1|
gi|28171130|gb|AY152180.1|AY152180S1		gi|296124573|gb|HM045817.1|
gi|28171139|gb|AY152184.1|AY152184S1		gi|296124570|gb|HM045816.1|
gi|28171148|gb|AY152188.1|AY152188S1		gi|296124567|gb|HM045815.1|
gi|28171157|gb|AY152192.1|AY152192S1		gi|296124564|gb|HM045814.1|
gi|28171166|gb|AY152196.1|AY152196S1		gi|296124561|gb|HM045813.1|
gi|28171175|gb|AY152200.1|AY152200S1		gi|296124558|gb|HM045812.1|
gi|28171184|gb|AY152204.1|AY152204S1		gi|296124555|gb|HM045811.1|
gi|28171193|gb|AY152208.1|AY152208S1		gi|296124552|gb|HM045810.1|
gi|28171202|gb|AY152212.1|AY152212S1		gi|296124549|gb|HM045809.1|
gi|28171211|gb|AY152216.1|AY152216S1		gi|296124546|gb|HM045808.1|
gi|28171220|gb|AY152220.1|AY152220S1		gi|296124544|gb|HM045807.1|
gi|28171229|gb|AY152224.1|AY152224S1		gi|296124541|gb|HM045806.1|
gi|28171238|gb|AY152228.1|AY152228S1		gi|296124538|gb|HM045805.1|
gi|28171247|gb|AY152232.1|AY152232S1		gi|296124535|gb|HM045804.1|
gi|28171256|gb|AY152236.1|AY152236S1		gi|296124532|gb|HM045803.1|
gi|28171265|gb|AY152240.1|AY152240S1		gi|296124529|gb|HM045802.1|
gi|28171274|gb|AY152244.1|AY152244S1		gi|296124526|gb|HM045801.1|
gi|28171283|gb|AY152248.1|AY152248S1		gi|296124523|gb|HM045800.1|
gi|28171292|gb|AY152252.1|AY152252S1		gi|296124520|gb|HM045799.1|
gi|28171301|gb|AY152256.1|AY152256S1		gi|296124518|gb|HM045798.1|
gi|28171310|gb|AY152260.1|AY152260S1		gi|296124515|gb|HM045797.1|
gi|28171319|gb|AY152264.1|AY152264S1		gi|296124512|gb|HM045796.1|
gi|28171328|gb|AY152268.1|AY152268S1		gi|296124510|gb|HM045795.1|
gi|28171337|gb|AY152272.1|AY152272S1		gi|296124507|gb|HM045794.1|
gi|28171346|gb|AY152276.1|AY152276S1		gi|296124504|gb|HM045793.1|
gi|28171355|gb|AY152280.1|AY152280S1		gi|296124501|gb|HM045792.1|
gi|28171364|gb|AY152284.1|AY152284S1		gi|296124498|gb|HM045791.1|
gi|28171373|gb|AY152288.1|AY152288S1		gi|296124495|gb|HM045790.1|
gi|28171382|gb|AY152292.1|AY152292S1		gi|296124492|gb|HM045789.1|
gi|28171391|gb|AY152296.1|AY152296S1		gi|296124489|gb|HM045788.1|
gi|28171400|gb|AY152300.1|AY152300S1		gi|296124486|gb|HM045787.1|
gi|28171409|gb|AY152304.1|AY152304S1		gi|296124483|gb|HM045786.1|
gi|28171418|gb|AY152308.1|AY152308S1		gi|296124480|gb|HM045785.1|
gi|28171427|gb|AY152312.1|AY152312S1		gi|296124477|gb|HM045784.1|
gi|28171436|gb|AY152316.1|AY152316S1		gi|343403341|emb|FR846307.1|
gi|28171445|gb|AY152320.1|AY152320S1		gi|343403339|emb|FR846306.1|
gi|28171454|gb|AY152324.1|AY152324S1		gi|343403337|emb|FR846305.1|
gi|28171463|gb|AY152328.1|AY152328S1		gi|343403335|emb|FR846304.1|
gi|28171472|gb|AY152332.1|AY152332S1		gi|338832563|gb|HQ529780.1|
gi|28171481|gb|AY152336.1|AY152336S1		gi|338832561|gb|HQ529779.1|
gi|28171490|gb|AY152340.1|AY152340S1		gi|338832559|gb|HQ529778.1|
gi|28171499|gb|AY152344.1|AY152344S1		gi|338832557|gb|HQ529777.1|
gi|28171508|gb|AY152348.1|AY152348S1		gi|320129386|gb|GU562830.1|
gi|28171517|gb|AY152352.1|AY152352S1		gi|320129384|gb|GU562829.1|
gi|28171526|gb|AY152356.1|AY152356S1		gi|320129382|gb|GU562828.1|
gi|28171535|gb|AY152360.1|AY152360S1		gi|320129380|gb|GU562827.1|
gi|28171543|gb|AY152364.1|		gi|320129378|gb|GU562826.1|
gi|28171545|gb|AY152365.1|		gi|334145773|gb|HQ456255.1|
gi|28171547|gb|AY152366.1|		gi|334145771|gb|HQ456254.1|
gi|28171549|gb|AY152367.1|		gi|334145769|gb|HQ456253.1|
gi|28171551|gb|AY152368.1|		gi|334145767|gb|HQ456252.1|
gi|28171553|gb|AY152369.1|		gi|334145765|gb|HQ456251.1|
gi|28171555|gb|AY152370.1|		gi|296784010|gb|HM038417.1|
gi|28171557|gb|AY152371.1|		gi|291191857|gb|GQ143750.1|
gi|28171559|gb|AY152372.1|		gi|291191855|gb|GQ143749.1|
gi|28171561|gb|AY152373.1|		gi|291191853|gb|GQ143748.1|
gi|28171563|gb|AY152374.1|		gi|291191851|gb|GQ143747.1|
gi|28171565|gb|AY152375.1|		gi|291191849|gb|GQ143746.1|
gi|28171567|gb|AY152376.1|		gi|291191847|gb|GQ143745.1|
gi|28171569|gb|AY152377.1|		gi|291191844|gb|GQ143743.1|
gi|28171571|gb|AY152378.1|		gi|291191842|gb|GQ143742.1|
gi|28171573|gb|AY152379.1|		gi|291191840|gb|GQ143741.1|
gi|28171575|gb|AY152380.1|		gi|291191846|gb|GQ143744.1|
gi|28171577|gb|AY152381.1|		gi|325975294|gb|JF272480.1|
gi|28171579|gb|AY152382.1|		gi|325975292|gb|JF272479.1|
gi|28171581|gb|AY152383.1|		gi|323516040|gb|AF490259.3|
gi|28171583|gb|AY152384.1|		gi|171918912|gb|EU403052.1|
gi|28171585|gb|AY152385.1|		gi|307696203|gb|GQ996379.1|
gi|28171587|gb|AY152386.1|		gi|307696201|gb|GQ996378.1|
gi|28171589|gb|AY152387.1|		gi|307696199|gb|GQ996377.1|
gi|28171591|gb|AY152388.1|		gi|307696197|gb|GQ996376.1|
gi|28171593|gb|AY152389.1|		gi|307696195|gb|GQ996375.1|
gi|28171595|gb|AY152855.1|		gi|307696193|gb|GQ996374.1|
gi|28171597|gb|AY152856.1|		gi|307696191|gb|GQ996373.1|
gi|28171599|gb|AY152857.1|		gi|307696189|gb|GQ996372.1|
gi|31322062|gb|AY158327.1|		gi|307696187|gb|GQ996371.1|
gi|31322064|gb|AY158328.1|		gi|307696185|gb|GQ996370.1|
gi|31322066|gb|AY158329.1|		gi|295974111|gb|FJ998173.1|
gi|31322068|gb|AY158330.1|		gi|299482777|gb|GU301781.1|
gi|31322070|gb|AY158331.1|		gi|299482774|gb|GU301780.1|
gi|31322072|gb|AY158332.1|		gi|299482771|gb|GU301779.1|
gi|31322074|gb|AY158333.1|		gi|156751972|gb|EU037962.1|
gi|31322076|gb|AY158334.1|		gi|300509536|gb|GU908223.1|
gi|31322078|gb|AY158335.1|		gi|251737944|gb|GQ229489.1|
gi|31322080|gb|AY158336.1|		gi|251737942|gb|GQ229488.1|
gi|31322082|gb|AY158337.1|		gi|251737940|gb|GQ229487.1|
gi|31322084|gb|AY158338.1|		gi|251737938|gb|GQ229486.1|
gi|31322086|gb|AY158339.1|		gi|298578082|gb|GQ905863.1|
gi|31322088|gb|AY158340.1|		gi|52352962|gb|AY726732.1|
gi|31322090|gb|AY158341.1|		gi|296168820|emb|FN295489.2|
gi|26245724|gb|AY167440.1|		gi|27734686|gb|AF369024.2|
gi|37730877|gb|AY183473.1|		gi|7264698|gb|AF192908.1|
gi|34596499|gb|AY206457.3|		gi|7264697|gb|AF192907.1|
gi|37674504|gb|AY237288.1|		gi|7264695|gb|AF192906.1|
gi|37674506|gb|AY237289.1|		gi|7264693|gb|AF192905.1|
gi|37674508|gb|AY237290.1|		gi|7264691|gb|AF192904.1|
gi|37674510|gb|AY237291.1|		gi|7264689|gb|AF192903.1|
gi|37674512|gb|AY237292.1|		gi|7264687|gb|AF192902.1|
gi|37674514|gb|AY237293.1|		gi|7264685|gb|AF192901.1|
gi|37674516|gb|AY237294.1|		gi|7264683|gb|AF192900.1|
gi|37674518|gb|AY237295.1|		gi|7264681|gb|AF192899.1|
gi|30351033|gb|AY265856.1|		gi|7264679|gb|AF192898.1|
gi|30351035|gb|AY265857.1|		gi|7264677|gb|AF192897.1|
gi|33468344|gb|AY277652.1|		gi|7264675|gb|AF192896.1|
gi|33468346|gb|AY277653.1|		gi|7264673|gb|AF192895.1|
gi|33468348|gb|AY277654.1|		gi|7264671|gb|AF192894.1|
gi|33468350|gb|AY277655.1|		gi|7264670|gb|AF192893.1|
gi|33468352|gb|AY277656.1|		gi|7264668|gb|AF192892.1|
gi|33468354|gb|AY277657.1|		gi|7264666|gb|AF192891.1|
gi|33468356|gb|AY277658.1|		gi|294822225|gb|GU969242.1|
gi|586668485|gb|AY277659.2|		gi|280983632|gb|GU199353.1|
gi|33468360|gb|AY277660.1|		gi|280983629|gb|GU199352.1|
gi|33468362|gb|AY277661.1|		gi|280983626|gb|GU199351.1|
gi|33468364|gb|AY277662.1|		gi|280983623|gb|GU199350.1|
gi|33468366|gb|AY277663.1|		gi|288572731|gb|GU013528.2|
gi|586668487|gb|AY277664.2|		gi|288572728|gb|GU013529.2|
gi|586668489|gb|AY277665.2|		gi|288572725|gb|GU013530.2|
gi|586668491|gb|AY277666.2|		gi|262073977|gb|FJ513679.1|
gi|33416224|gb|AY338492.1|		gi|262073974|gb|FJ513675.1|
gi|33416226|gb|AY338493.1|		gi|262073971|gb|FJ513673.1|
gi|33416228|gb|AY338494.1|		gi|262073968|gb|FJ513657.1|
gi|34099629|gb|AY359463.1|		gi|262073965|gb|FJ513654.1|
gi|34733325|gb|AY373383.1|		gi|262073962|gb|FJ513645.1|
gi|34733327|gb|AY373384.1|		gi|262073959|gb|FJ513637.1|
gi|34733329|gb|AY373385.1|		gi|262073956|gb|FJ513635.1|
gi|34733242|gb|AY373427.1|		gi|262073953|gb|FJ513632.1|
gi|54072667|gb|AY376737.1|		gi|262073950|gb|FJ513629.1|
gi|37963457|gb|AY376738.1|		gi|262073947|gb|FJ513628.1|
gi|38327267|gb|AY422468.1|		gi|253750842|gb|FJ513678.1|
gi|38327269|gb|AY422469.1|		gi|253750840|gb|FJ513677.1|
gi|38327271|gb|AY422470.1|		gi|253750838|gb|FJ513676.1|
gi|38327273|gb|AY422471.1|		gi|253750834|gb|FJ513674.1|
gi|37703010|gb|AY422777.1|		gi|253750830|gb|FJ513672.1|
gi|37703012|gb|AY422778.1|		gi|253750828|gb|FJ513671.1|
gi|37703014|gb|AY422779.1|		gi|253750826|gb|FJ513670.1|
gi|37703016|gb|AY422780.1|		gi|253750824|gb|FJ513669.1|
gi|37703018|gb|AY422781.1|		gi|253750822|gb|FJ513668.1|
gi|37703020|gb|AY422782.1|		gi|253750820|gb|FJ513667.1|
gi|37703022|gb|AY422783.1|		gi|253750818|gb|FJ513666.1|
gi|37703024|gb|AY422784.1|		gi|253750816|gb|FJ513665.1|
gi|37703026|gb|AY422785.1|		gi|253750814|gb|FJ513664.1|
gi|37703028|gb|AY422786.1|		gi|253750812|gb|FJ513663.1|
gi|42410860|gb|AY449675.1|		gi|253750810|gb|FJ513662.1|
gi|42410862|gb|AY449676.1|		gi|253750808|gb|FJ513661.1|
gi|42410864|gb|AY449677.1|		gi|253750806|gb|FJ513660.1|
gi|42410866|gb|AY449678.1|		gi|253750804|gb|FJ513659.1|
gi|42410868|gb|AY449679.1|		gi|253750802|gb|FJ513658.1|
gi|42410870|gb|AY449680.1|		gi|253750798|gb|FJ513656.1|
gi|42410872|gb|AY449681.1|		gi|253750796|gb|FJ513655.1|
gi|42410874|gb|AY449682.1|		gi|253750792|gb|FJ513653.1|
gi|42410876|gb|AY449683.1|		gi|253750790|gb|FJ513652.1|
gi|42410878|gb|AY449684.1|		gi|253750788|gb|FJ513651.1|
gi|42410880|gb|AY449685.1|		gi|253750786|gb|FJ513650.1|
gi|42742262|gb|AY466449.1|		gi|253750784|gb|FJ513649.1|
gi|56384984|gb|AY484598.3|		gi|253750782|gb|FJ513648.1|
gi|56384986|gb|AY484599.3|		gi|253750780|gb|FJ513647.1|
gi|56384988|gb|AY484600.3|		gi|253750778|gb|FJ513646.1|
gi|56384990|gb|AY484601.3|		gi|253750774|gb|FJ513644.1|
gi|56384992|gb|AY484602.3|		gi|253750772|gb|FJ513643.1|
gi|56384994|gb|AY484603.3|		gi|253750770|gb|FJ513642.1|
gi|56384996|gb|AY484604.3|		gi|253750768|gb|FJ513641.1|
gi|56384998|gb|AY484605.3|		gi|253750766|gb|FJ513640.1|
gi|56385000|gb|AY484606.3|		gi|253750764|gb|FJ513639.1|
gi|56385002|gb|AY484607.3|		gi|253750762|gb|FJ513638.1|
gi|56385004|gb|AY484608.3|		gi|253750758|gb|FJ513636.1|
gi|56089452|gb|AY484609.2|		gi|253750754|gb|FJ513634.1|
gi|56089454|gb|AY484610.2|		gi|253750752|gb|FJ513633.1|
gi|56089456|gb|AY484611.2|		gi|253750748|gb|FJ513631.1|
gi|56089458|gb|AY484612.2|		gi|253750746|gb|FJ513630.1|
gi|56089460|gb|AY484613.2|		gi|133872767|gb|EF451142.1|
gi|56089462|gb|AY484614.2|		gi|16904821|gb|AF438162.1|
gi|56089464|gb|AY484615.2|		gi|288572722|gb|FJ445511.2|
gi|56089466|gb|AY484616.2|		gi|288572719|gb|FJ445510.2|
gi|56089468|gb|AY484617.2|		gi|288572716|gb|FJ445502.2|
gi|56089470|gb|AY484618.2|		gi|288572713|gb|FJ445484.2|
gi|56089472|gb|AY484619.2|		gi|288572710|gb|FJ445463.2|
gi|56089474|gb|AY484620.2|		gi|288572707|gb|FJ445445.2|
gi|56089476|gb|AY484621.2|		gi|288572704|gb|FJ445443.2|
gi|56089478|gb|AY484622.2|		gi|288572701|gb|FJ445433.2|
gi|56089480|gb|AY484623.2|		gi|288572698|gb|FJ445432.2|
gi|56089482|gb|AY484624.2|		gi|288572695|gb|FJ445431.2|
gi|56089484|gb|AY484625.2|		gi|288572692|gb|FJ445430.2|
gi|56089486|gb|AY484626.2|		gi|288572689|gb|FJ445428.2|
gi|56089488|gb|AY484627.2|		gi|288572686|gb|FJ445427.2|
gi|56089490|gb|AY484628.2|		gi|288572683|gb|FJ445426.2|
gi|56089492|gb|AY484629.2|		gi|262410955|gb|FJ807899.1|
gi|56089494|gb|AY484630.2|		gi|262410952|gb|FJ807898.1|
gi|56089496|gb|AY484631.2|		gi|262410949|gb|FJ807897.1|
gi|56089498|gb|AY484632.2|		gi|262410946|gb|FJ807896.1|
gi|56089500|gb|AY484633.2|		gi|262410944|gb|FJ807895.1|
gi|56089502|gb|AY484634.2|		gi|262410942|gb|FJ807894.1|
gi|56089504|gb|AY484635.2|		gi|262410940|gb|FJ807893.1|
gi|56089506|gb|AY484636.2|		gi|262410938|gb|FJ807892.1|
gi|56089508|gb|AY484637.2|		gi|262410936|gb|FJ807891.1|
gi|56089510|gb|AY484638.2|		gi|262410934|gb|FJ807890.1|
gi|56089512|gb|AY484639.2|		gi|262410932|gb|FJ807889.1|
gi|56089514|gb|AY484640.2|		gi|262410930|gb|FJ807888.1|
gi|56089516|gb|AY484641.2|		gi|262410928|gb|FJ807887.1|
gi|56089518|gb|AY484642.2|		gi|262410926|gb|FJ807886.1|
gi|56089520|gb|AY484643.2|		gi|262093242|gb|GQ428215.1|
gi|56089522|gb|AY484644.2|		gi|262093239|gb|GQ428214.1|
gi|56089524|gb|AY484645.2|		gi|262093236|gb|GQ428213.1|
gi|56089526|gb|AY484646.2|		gi|262093233|gb|GQ428212.1|
gi|56089528|gb|AY484647.2|		gi|262093230|gb|GQ428211.1|
gi|56089530|gb|AY484648.2|		gi|262093227|gb|GQ428210.1|
gi|56089532|gb|AY484649.2|		gi|239836360|gb|FJ445509.1|
gi|56089534|gb|AY484650.2|		gi|239836358|gb|FJ445508.1|
gi|56089536|gb|AY484651.2|		gi|239836356|gb|FJ445507.1|
gi|56089538|gb|AY484652.2|		gi|239836354|gb|FJ445506.1|
gi|56089540|gb|AY484653.2|		gi|239836352|gb|FJ445505.1|
gi|56089542|gb|AY484654.2|		gi|239836350|gb|FJ445504.1|
gi|56089544|gb|AY484655.2|		gi|239836348|gb|FJ445503.1|
gi|56089546|gb|AY484656.2|		gi|239836344|gb|FJ445501.1|
gi|56089548|gb|AY484657.2|		gi|239836342|gb|FJ445500.1|
gi|56089550|gb|AY484658.2|		gi|239836340|gb|FJ445499.1|
gi|56089552|gb|AY484659.2|		gi|239836338|gb|FJ445498.1|
gi|56089554|gb|AY484660.2|		gi|239836336|gb|FJ445497.1|
gi|56089556|gb|AY484661.2|		gi|239836334|gb|FJ445496.1|
gi|56089558|gb|AY484662.2|		gi|239836332|gb|FJ445495.1|
gi|56089560|gb|AY484663.2|		gi|239836330|gb|FJ445494.1|
gi|56089562|gb|AY484664.2|		gi|239836328|gb|FJ445493.1|
gi|56089564|gb|AY484665.2|		gi|239836326|gb|FJ445492.1|
gi|56089566|gb|AY484666.2|		gi|239836324|gb|FJ445491.1|
gi|56089568|gb|AY484667.2|		gi|239836322|gb|FJ445490.1|
gi|89242727|gb|AY496871.2|		gi|239836320|gb|FJ445489.1|
gi|44952529|gb|AY496872.1|		gi|239836318|gb|FJ445488.1|
gi|89242729|gb|AY496873.2|		gi|239836316|gb|FJ445487.1|
gi|89242731|gb|AY496874.2|		gi|239836314|gb|FJ445486.1|
gi|44952744|gb|AY496875.1|		gi|239836312|gb|FJ445485.1|
gi|44952800|gb|AY496876.1|		gi|239836308|gb|FJ445483.1|
gi|89242733|gb|AY496877.2|		gi|239836306|gb|FJ445482.1|
gi|44952940|gb|AY496878.1|		gi|239836304|gb|FJ445481.1|
gi|89242735|gb|AY496879.2|		gi|239836302|gb|FJ445480.1|
gi|41056912|gb|AY512567.1|		gi|239836300|gb|FJ445479.1|
gi|41056914|gb|AY512568.1|		gi|239836298|gb|FJ445478.1|
gi|41056916|gb|AY512569.1|		gi|239836296|gb|FJ445477.1|
gi|47681484|gb|AY550909.1|		gi|239836294|gb|FJ445476.1|
gi|47716952|gb|AY559316.1|		gi|239836292|gb|FJ445475.1|
gi|50953693|gb|AY577430.1|		gi|239836290|gb|FJ445474.1|
gi|50953695|gb|AY577431.1|		gi|239836288|gb|FJ445473.1|
gi|50953697|gb|AY577432.1|		gi|239836286|gb|FJ445472.1|
gi|50953699|gb|AY577433.1|		gi|239836284|gb|FJ445471.1|
gi|50953701|gb|AY577434.1|		gi|239836282|gb|FJ445470.1|
gi|50953703|gb|AY577435.1|		gi|239836280|gb|FJ445469.1|
gi|50953705|gb|AY577436.1|		gi|239836278|gb|FJ445468.1|
gi|50953707|gb|AY577437.1|		gi|239836276|gb|FJ445467.1|
gi|50953709|gb|AY577438.1|		gi|239836274|gb|FJ445466.1|
gi|50953711|gb|AY577439.1|		gi|239836272|gb|FJ445465.1|
gi|46520114|gb|AY588272.1|		gi|239836270|gb|FJ445464.1|
gi|46520116|gb|AY588273.1|		gi|239836266|gb|FJ445462.1|
gi|46562293|gb|AY589692.1|		gi|239836264|gb|FJ445461.1|
gi|47231512|gb|AY600860.1|		gi|239836262|gb|FJ445460.1|
gi|47681467|gb|AY606062.1|		gi|239836260|gb|FJ445459.1|
gi|47933664|gb|AY618210.1|		gi|239836258|gb|FJ445458.1|
gi|47933666|gb|AY618211.1|		gi|239836256|gb|FJ445457.1|
gi|48093745|gb|AY618877.1|		gi|239836254|gb|FJ445456.1|
gi|48093747|gb|AY618878.1|		gi|239836252|gb|FJ445455.1|
gi|48093749|gb|AY618879.1|		gi|239836250|gb|FJ445454.1|
gi|48093751|gb|AY618880.1|		gi|239836248|gb|FJ445453.1|
gi|53653598|gb|AY618935.1|		gi|239836246|gb|FJ445452.1|
gi|53653600|gb|AY618936.1|		gi|239836244|gb|FJ445451.1|
gi|53653602|gb|AY618937.1|		gi|239836242|gb|FJ445450.1|
gi|53653604|gb|AY618938.1|		gi|239836240|gb|FJ445449.1|
gi|53653606|gb|AY618939.1|		gi|239836238|gb|FJ445448.1|
gi|53653608|gb|AY618940.1|		gi|239836236|gb|FJ445447.1|
gi|53653610|gb|AY618941.1|		gi|239836234|gb|FJ445446.1|
gi|53653612|gb|AY618942.1|		gi|239836230|gb|FJ445444.1|
gi|53653614|gb|AY618943.1|		gi|239836226|gb|FJ445442.1|
gi|53653616|gb|AY618944.1|		gi|239836224|gb|FJ445441.1|
gi|53653618|gb|AY618945.1|		gi|239836222|gb|FJ445440.1|
gi|53653620|gb|AY618946.1|		gi|239836220|gb|FJ445439.1|
gi|53653622|gb|AY618947.1|		gi|239836218|gb|FJ445438.1|
gi|53653624|gb|AY618948.1|		gi|239836216|gb|FJ445437.1|
gi|53653626|gb|AY618949.1|		gi|239836214|gb|FJ445436.1|
gi|53653628|gb|AY618950.1|		gi|239836212|gb|FJ445435.1|
gi|53653630|gb|AY618951.1|		gi|239836210|gb|FJ445434.1|
gi|53653632|gb|AY618952.1|		gi|239836200|gb|FJ445429.1|
gi|53653634|gb|AY618953.1|		gi|239836192|gb|FJ445425.1|
gi|53653636|gb|AY618954.1|		gi|239836190|gb|FJ445424.1|
gi|53653638|gb|AY618955.1|		gi|189409709|gb|EU703762.1|
gi|53653640|gb|AY618956.1|		gi|189409706|gb|EU703761.1|
gi|53653642|gb|AY618957.1|		gi|189409703|gb|EU703760.1|
gi|53653644|gb|AY618958.1|		gi|189409700|gb|EU703759.1|
gi|53653646|gb|AY618959.1|		gi|157092545|gb|EF613344.1|
gi|53653648|gb|AY618960.1|		gi|157092543|gb|EF613343.1|
gi|53653650|gb|AY618961.1|		gi|157092541|gb|EF613342.1|
gi|53653652|gb|AY618962.1|		gi|147743338|gb|EF559252.1|
gi|53653654|gb|AY618963.1|		gi|133779733|gb|EF452494.1|
gi|53653656|gb|AY618964.1|		gi|133779730|gb|EF452493.1|
gi|53653658|gb|AY618965.1|		gi|289324561|dbj|FU759520.1|
gi|53653660|gb|AY618966.1|		gi|289324514|dbj|FU759473.1|
gi|53653662|gb|AY618967.1|		gi|289324513|dbj|FU759472.1|
gi|53653664|gb|AY618968.1|		gi|289324512|dbj|FU759471.1|
gi|53653666|gb|AY618969.1|		gi|289324511|dbj|FU759470.1|
gi|53653668|gb|AY618970.1|		gi|289324510|dbj|FU759469.1|
gi|53653670|gb|AY618971.1|		gi|289324509|dbj|FU759468.1|
gi|53653672|gb|AY618972.1|		gi|289324508|dbj|FU759467.1|
gi|53653674|gb|AY618973.1|		gi|289324507|dbj|FU759466.1|
gi|53653676|gb|AY618974.1|		gi|289324506|dbj|FU759465.1|
gi|53653678|gb|AY618975.1|		gi|289324505|dbj|FU759464.1|
gi|53653680|gb|AY618976.1|		gi|289324504|dbj|FU759463.1|
gi|53653682|gb|AY618977.1|		gi|289324503|dbj|FU759462.1|
gi|53653684|gb|AY618978.1|		gi|289324502|dbj|FU759461.1|
gi|53653686|gb|AY618979.1|		gi|289324501|dbj|FU759460.1|
gi|53653688|gb|AY618980.1|		gi|259014734|gb|FJ959103.1|
gi|53653690|gb|AY618981.1|		gi|240148391|gb|GQ168719.1|
gi|53653692|gb|AY618982.1|		gi|169655822|gb|EU188924.2|
gi|53653694|gb|AY618983.1|		gi|215260061|gb|FJ432665.1|
gi|53653696|gb|AY618984.1|		gi|126361457|gb|L37661.3|CKGPOLY
gi|53653698|gb|AY618985.1|		gi|221229073|gb|FJ000069.1|
gi|53653700|gb|AY618986.1|		gi|221229070|gb|FJ000068.1|
gi|53653702|gb|AY618987.1|		gi|221229067|gb|FJ000067.1|
gi|53653742|gb|AY618988.1|		gi|221229064|gb|FJ000066.1|
gi|53653744|gb|AY618989.1|		gi|221229061|gb|FJ000065.1|
gi|53653746|gb|AY618990.1|		gi|221229058|gb|FJ000064.1|
gi|53653748|gb|AY618991.1|		gi|221229055|gb|FJ000063.1|
gi|53653750|gb|AY618992.1|		gi|221229052|gb|FJ000062.1|
gi|53653752|gb|AY618993.1|		gi|47156193|gb|AY549584.1|
gi|47934180|gb|AY620946.1|		gi|47156191|gb|AY549583.1|
gi|47934182|gb|AY620947.1|		gi|47156189|gb|AY549582.1|
gi|47934184|gb|AY620948.1|		gi|47156187|gb|AY549581.1|
gi|47934186|gb|AY620949.1|		gi|47156185|gb|AY549580.1|
gi|47934188|gb|AY620950.1|		gi|47156183|gb|AY549579.1|
gi|47934190|gb|AY620951.1|		gi|47156181|gb|AY549578.1|
gi|47934192|gb|AY620952.1|		gi|47156179|gb|AY549577.1|
gi|47934194|gb|AY620953.1|		gi|47156177|gb|AY549576.1|
gi|54402139|gb|AY630407.1|		gi|47156175|gb|AY549575.1|
gi|54402141|gb|AY630408.1|		gi|40317151|gb|AY424803.1|
gi|52078062|gb|AY632355.1|		gi|28193962|gb|AF339485.1|
gi|49246468|gb|AY642588.1|		gi|171918919|gb|EU244823.2|
gi|49618872|gb|AY644452.1|		gi|169655828|gb|EU190884.2|
gi|50080845|gb|AY648961.1|		gi|169655826|gb|EU190881.2|
gi|56069224|gb|AY656669.1|		gi|124295281|gb|EF051584.1|
gi|56069226|gb|AY656670.1|		gi|169798710|gb|EU372006.1|
gi|56069228|gb|AY656671.1|		gi|242341869|emb|HB423144.1|
gi|56069230|gb|AY656672.1|		gi|242341868|emb|HB423143.1|
gi|56069232|gb|AY656673.1|		gi|239703911|emb|HB338846.1|
gi|56069234|gb|AY656674.1|		gi|239703910|emb|HB338845.1|
gi|50347096|gb|AY662691.1|		gi|186469996|gb|EF210157.2|
gi|56411599|gb|AY676348.1|		gi|167859604|gb|EU441883.1|
gi|56411601|gb|AY676349.1|		gi|167859602|gb|EU441882.1|
gi|56411603|gb|AY676350.1|		gi|218591565|emb|GM047824.1|
gi|56411605|gb|AY676351.1|		gi|218591564|emb|GM047823.1|
gi|56411607|gb|AY676352.1|		gi|218591563|emb|GM047822.1|
gi|56411609|gb|AY676353.1|		gi|218101219|emb|GM839456.1|
gi|56411611|gb|AY676354.1|		gi|218101216|emb|GM839385.1|
gi|56411613|gb|AY676355.1|		gi|218101215|emb|GM839384.1|
gi|56411615|gb|AY676356.1|		gi|218101214|emb|GM839383.1|
gi|56411617|gb|AY676357.1|		gi|218101213|emb|GM839382.1|
gi|56411619|gb|AY676358.1|		gi|218101211|emb|GM839381.1|
gi|56411621|gb|AY676359.1|		gi|218101210|emb|GM839380.1|
gi|56411623|gb|AY676360.1|		gi|218101209|emb|GM839379.1|
gi|56411625|gb|AY676361.1|		gi|218101208|emb|GM839378.1|
gi|56411627|gb|AY676362.1|		gi|218101207|emb|GM839377.1|
gi|56411629|gb|AY676363.1|		gi|218101205|emb|GM839376.1|
gi|56411631|gb|AY676364.1|		gi|218101204|emb|GM839375.1|
gi|56411633|gb|AY676365.1|		gi|218101203|emb|GM839374.1|
gi|56411635|gb|AY676366.1|		gi|218101202|emb|GM839373.1|
gi|56411637|gb|AY676367.1|		gi|218101201|emb|GM839372.1|
gi|56411639|gb|AY676368.1|		gi|195973182|gb|EU886198.1|
gi|56411641|gb|AY676369.1|		gi|189418707|gb|EU564335.1|
gi|56411643|gb|AY676370.1|		gi|189418704|gb|EU564334.1|
gi|56411645|gb|AY676371.1|		gi|164453045|gb|EU192143.1|
gi|56411647|gb|AY676372.1|		gi|164453043|gb|EU192142.1|
gi|56411649|gb|AY676373.1|		gi|161789908|gb|EU272132.1|
gi|56411651|gb|AY676374.1|		gi|116295203|gb|EF012359.1|
gi|56411653|gb|AY676375.1|		gi|124295597|gb|EF027141.1|
gi|56411655|gb|AY676376.1|		gi|124295594|gb|EF027140.1|
gi|56411657|gb|AY676377.1|		gi|124295591|gb|EF027139.1|
gi|56411659|gb|AY676378.1|		gi|124295588|gb|EF027138.1|
gi|56411661|gb|AY676379.1|		gi|124295585|gb|EF027137.1|
gi|56411663|gb|AY676380.1|		gi|124295582|gb|EF027136.1|
gi|56411665|gb|AY676381.1|		gi|124295579|gb|EF027135.1|
gi|56411667|gb|AY676382.1|		gi|124295576|gb|EF027134.1|
gi|56411669|gb|AY676383.1|		gi|133872781|gb|EF451149.1|
gi|56411671|gb|AY676384.1|		gi|133872779|gb|EF451148.1|
gi|56411673|gb|AY676385.1|		gi|133872777|gb|EF451147.1|
gi|56411675|gb|AY676386.1|		gi|133872775|gb|EF451146.1|
gi|56411677|gb|AY676387.1|		gi|133872773|gb|EF451145.1|
gi|56411679|gb|AY676388.1|		gi|133872771|gb|EF451144.1|
gi|56411681|gb|AY676389.1|		gi|133872769|gb|EF451143.1|
gi|56411683|gb|AY676390.1|		gi|116047549|gb|DQ443544.2|
gi|56411685|gb|AY676391.1|		gi|91260018|gb|DQ451151.1|
gi|56411687|gb|AY676392.1|		gi|91260001|gb|DQ451150.1|
gi|56411689|gb|AY676393.1|		gi|91259986|gb|DQ451149.1|
gi|56411691|gb|AY676394.1|		gi|94483490|gb|DQ462750.1|
gi|56411693|gb|AY676395.1|		gi|94483488|gb|DQ462749.1|
gi|56411695|gb|AY676396.1|		gi|94483486|gb|DQ462748.1|
gi|56411697|gb|AY676397.1|		gi|94483484|gb|DQ462747.1|
gi|56411699|gb|AY676398.1|		gi|94483482|gb|DQ462746.1|
gi|56411701|gb|AY676399.1|		gi|106880551|emb|AM258995.1|
gi|56411703|gb|AY676400.1|		gi|106880547|emb|AM258994.1|
gi|56411705|gb|AY676401.1|		gi|106880543|emb|AM258993.1|
gi|56411707|gb|AY676402.1|		gi|106880539|emb|AM258992.1|
gi|56411709|gb|AY676403.1|		gi|106880535|emb|AM258991.1|
gi|56411711|gb|AY676404.1|		gi|100801736|emb|AM258990.1|
gi|56411713|gb|AY676405.1|		gi|92111512|gb|DQ489787.1|
gi|56411715|gb|AY676406.1|
gi|56411717|gb|AY676407.1|
gi|56411719|gb|AY676408.1|
gi|56411721|gb|AY676409.1|
gi|56411723|gb|AY676410.1|
gi|56411725|gb|AY676411.1|
gi|56411727|gb|AY676412.1|
gi|56411729|gb|AY676413.1|
gi|56411731|gb|AY676414.1|
gi|56411733|gb|AY676415.1|
gi|56411735|gb|AY676416.1|
gi|56411737|gb|AY676417.1|
gi|56411739|gb|AY676418.1|
gi|56411741|gb|AY676419.1|
gi|56411743|gb|AY676420.1|
gi|56411745|gb|AY676421.1|
gi|50657545|gb|AY679147.1|
gi|56808993|gb|AY702030.1|
gi|56808995|gb|AY702031.1|
gi|56808997|gb|AY702032.1|
gi|56808999|gb|AY702033.1|
gi|56809001|gb|AY702034.1|
gi|56809003|gb|AY702035.1|
gi|56809005|gb|AY702036.1|
gi|56809007|gb|AY702037.1|
gi|56809009|gb|AY702038.1|
gi|56809011|gb|AY702039.1|
gi|56809013|gb|AY702040.1|
gi|56809015|gb|AY702041.1|
gi|56809017|gb|AY702042.1|
gi|56809019|gb|AY702043.1|
gi|56809021|gb|AY702044.1|
gi|56809023|gb|AY702045.1|
gi|56809025|gb|AY702046.1|
gi|56809027|gb|AY702047.1|
gi|56809029|gb|AY702048.1|
gi|56809031|gb|AY702049.1|
gi|56809033|gb|AY702050.1|
gi|56809035|gb|AY702051.1|
gi|56809037|gb|AY702052.1|
gi|56809039|gb|AY702053.1|
gi|56809041|gb|AY702054.1|
gi|56809043|gb|AY702055.1|
gi|56809045|gb|AY702056.1|
gi|56809047|gb|AY702057.1|
gi|56809049|gb|AY702058.1|
gi|56809051|gb|AY702059.1|
gi|56809053|gb|AY702060.1|
gi|58004722|gb|AY705986.1|
gi|58004724|gb|AY705987.1|
gi|82408375|gb|AY705988.2|
gi|58004728|gb|AY705989.1|
gi|58004696|gb|AY705990.1|
gi|58004698|gb|AY705991.1|
gi|58004700|gb|AY705992.1|
gi|58004702|gb|AY705993.1|
gi|58004704|gb|AY705994.1|
gi|58004706|gb|AY705995.1|
gi|58004708|gb|AY705996.1|
gi|58004710|gb|AY705997.1|
gi|58004712|gb|AY705998.1|
gi|58004714|gb|AY705999.1|
gi|58004716|gb|AY706000.1|
gi|58004718|gb|AY706001.1|
gi|58004801|gb|AY706002.1|
gi|58004803|gb|AY706003.1|
gi|58004805|gb|AY706004.1|
gi|58004807|gb|AY706005.1|
gi|58004809|gb|AY706006.1|
gi|58004811|gb|AY706007.1|
gi|58004813|gb|AY706008.1|
gi|58004815|gb|AY706009.1|
gi|58004817|gb|AY706010.1|
gi|58004819|gb|AY706011.1|
gi|58004821|gb|AY706012.1|
gi|58004823|gb|AY706013.1|
gi|58004825|gb|AY706014.1|
gi|58004827|gb|AY706015.1|
gi|58004829|gb|AY706016.1|
gi|58004831|gb|AY706017.1|
gi|56698931|gb|AY708047.1|
gi|56698935|gb|AY713473.1|
gi|56698937|gb|AY713474.1|
gi|56698939|gb|AY713475.1|
gi|56698941|gb|AY713476.1|
gi|53760530|gb|AY714061.1|
gi|53760532|gb|AY714062.1|
gi|56718801|gb|AY722801.1|
gi|56718803|gb|AY722802.1|
gi|56718805|gb|AY722803.1|
gi|56718853|gb|AY726549.1|
gi|56718855|gb|AY726550.1|
gi|56718857|gb|AY726551.1|
gi|56718859|gb|AY726552.1|
gi|56718861|gb|AY726553.1|
gi|56718863|gb|AY726554.1|
gi|56718865|gb|AY726555.1|
gi|58044097|gb|AY732378.1|
gi|58044099|gb|AY732379.1|
gi|58044101|gb|AY732380.1|
gi|58044103|gb|AY732381.1|
gi|58044105|gb|AY732382.1|
gi|58044107|gb|AY732383.1|
gi|58044109|gb|AY732384.1|
gi|58044111|gb|AY732385.1|
gi|58044113|gb|AY732386.1|
gi|58044115|gb|AY732387.1|
gi|58044117|gb|AY732388.1|
gi|58044119|gb|AY732389.1|
gi|58044121|gb|AY732390.1|
gi|58044123|gb|AY732391.1|
gi|58044125|gb|AY732392.1|
gi|58044127|gb|AY732393.1|
gi|58044129|gb|AY732394.1|
gi|58044131|gb|AY732395.1|
gi|58044133|gb|AY732396.1|
gi|58044135|gb|AY732397.1|
gi|58044137|gb|AY732398.1|
gi|58044139|gb|AY732399.1|
gi|58044141|gb|AY732400.1|
gi|58044143|gb|AY732401.1|
gi|58044145|gb|AY732402.1|
gi|58044147|gb|AY732403.1|
gi|58044149|gb|AY732404.1|
gi|58044151|gb|AY732405.1|
gi|58044153|gb|AY732406.1|
gi|58044155|gb|AY732407.1|
gi|58044157|gb|AY732408.1|
gi|58044159|gb|AY732409.1|
gi|58044161|gb|AY732410.1|
gi|58044163|gb|AY732411.1|
gi|58044165|gb|AY732412.1|
gi|58044167|gb|AY732413.1|
gi|58044169|gb|AY732414.1|
gi|58044171|gb|AY732415.1|
gi|58044173|gb|AY732416.1|
gi|58044175|gb|AY732417.1|
gi|58044177|gb|AY732418.1|
gi|58044179|gb|AY732419.1|
gi|58044181|gb|AY732420.1|
gi|58044183|gb|AY732421.1|
gi|58044185|gb|AY732422.1|
gi|58044187|gb|AY732423.1|
gi|58044189|gb|AY732424.1|
gi|58044191|gb|AY732425.1|
gi|58044193|gb|AY732426.1|
gi|58044195|gb|AY732427.1|
gi|58044197|gb|AY732428.1|
gi|58044199|gb|AY732429.1|
gi|58044201|gb|AY732430.1|
gi|58044203|gb|AY732431.1|
gi|58044205|gb|AY732432.1|
gi|58044207|gb|AY732433.1|
gi|58044209|gb|AY732434.1|
gi|58044211|gb|AY732435.1|
gi|58044213|gb|AY732436.1|
gi|58044215|gb|AY732437.1|
gi|58044217|gb|AY732438.1|
gi|58044219|gb|AY732439.1|
gi|58044221|gb|AY732440.1|
gi|58044223|gb|AY732441.1|
gi|58044225|gb|AY732442.1|
gi|58044227|gb|AY732443.1|
gi|58044229|gb|AY732444.1|
gi|58044231|gb|AY732445.1|
gi|58044233|gb|AY732446.1|
gi|58044235|gb|AY732447.1|
gi|58044237|gb|AY732448.1|
gi|58044239|gb|AY732449.1|
gi|58044241|gb|AY732450.1|
gi|58044243|gb|AY732451.1|
gi|58044245|gb|AY732452.1|
gi|58044247|gb|AY732453.1|
gi|58044249|gb|AY732454.1|
gi|58044251|gb|AY732455.1|
gi|58044253|gb|AY732456.1|
gi|58044255|gb|AY732457.1|
gi|58044257|gb|AY732458.1|
gi|58044259|gb|AY732459.1|
gi|58044261|gb|AY732460.1|
gi|58044263|gb|AY732461.1|
gi|58044265|gb|AY732462.1|
gi|58044267|gb|AY732463.1|
gi|58044269|gb|AY732464.1|
gi|58044271|gb|AY732465.1|
gi|58044273|gb|AY732466.1|
gi|58044275|gb|AY732467.1|
gi|58044277|gb|AY732468.1|
gi|58044279|gb|AY732469.1|
gi|58044281|gb|AY732470.1|
gi|58044283|gb|AY732471.1|
gi|58044285|gb|AY732472.1|
gi|58044287|gb|AY732473.1|
gi|58044289|gb|AY732474.1|
gi|58044291|gb|AY732475.1|
gi|58044293|gb|AY732476.1|
gi|58044295|gb|AY732477.1|
gi|58044297|gb|AY732478.1|
gi|58044299|gb|AY732479.1|
gi|58044301|gb|AY732480.1|
gi|58044303|gb|AY732481.1|
gi|58044305|gb|AY732482.1|
gi|58044307|gb|AY732483.1|
gi|58200430|gb|AY744677.1|
gi|58200432|gb|AY744678.1|
gi|58200434|gb|AY744679.1|
gi|58200436|gb|AY744680.1|
gi|58200438|gb|AY744681.1|
gi|58200440|gb|AY744682.1|
gi|58200442|gb|AY744683.1|
gi|58200444|gb|AY744684.1|
gi|58200446|gb|AY744685.1|
gi|58293846|gb|AY750713.1|
gi|58293848|gb|AY750714.1|
gi|58293850|gb|AY750715.1|
gi|58293852|gb|AY750716.1|
gi|58293854|gb|AY750717.1|
gi|58293856|gb|AY750718.1|
gi|54287947|gb|AY762084.1|
gi|54287949|gb|AY762085.1|
gi|54401698|gb|AY766104.1|
gi|187479899|gb|AY770511.2|
gi|66843743|gb|AY775303.1|
gi|66843745|gb|AY775304.1|
gi|66843747|gb|AY775305.1|
gi|66843749|gb|AY775306.1|
gi|66843750|gb|AY775307.1|
gi|56698826|gb|AY776328.1|
gi|56698828|gb|AY776329.1|
gi|56800304|gb|AY776330.1|
gi|57472011|gb|AY778960.1|
gi|57472013|gb|AY778961.1|
gi|55275817|gb|AY780642.1|
gi|55275819|gb|AY780643.1|
gi|55275821|gb|AY780644.1|
gi|60593333|gb|AY786188.1|
gi|60593335|gb|AY786189.1|
gi|60593337|gb|AY786190.1|
gi|60593339|gb|AY786191.1|
gi|60593341|gb|AY786192.1|
gi|60593343|gb|AY786193.1|
gi|60593345|gb|AY786194.1|
gi|60593347|gb|AY786195.1|
gi|60593349|gb|AY786196.1|
gi|60593351|gb|AY786197.1|
gi|60593353|gb|AY786198.1|
gi|60593355|gb|AY786199.1|
gi|60593357|gb|AY786200.1|
gi|60593359|gb|AY786201.1|
gi|60593361|gb|AY786202.1|
gi|60280374|gb|AY786366.1|
gi|60280376|gb|AY786367.1|
gi|60280378|gb|AY786368.1|
gi|60280380|gb|AY786369.1|
gi|60280382|gb|AY786370.1|
gi|60280384|gb|AY786371.1|
gi|60280386|gb|AY786372.1|
gi|60280388|gb|AY786373.1|
gi|60280390|gb|AY786374.1|
gi|60280392|gb|AY786375.1|
gi|60280394|gb|AY786376.1|
gi|60280396|gb|AY786377.1|
gi|60280398|gb|AY786378.1|
gi|60280400|gb|AY786379.1|
gi|60280402|gb|AY786380.1|
gi|60280404|gb|AY786381.1|
gi|60280406|gb|AY786382.1|
gi|60280408|gb|AY786383.1|
gi|60280410|gb|AY786384.1|
gi|60280412|gb|AY786385.1|
gi|60280414|gb|AY786386.1|
gi|60280416|gb|AY786387.1|
gi|60280418|gb|AY786388.1|
gi|60280420|gb|AY786389.1|
gi|60280422|gb|AY786390.1|
gi|60280424|gb|AY786391.1|
gi|60280426|gb|AY786392.1|
gi|60280428|gb|AY786393.1|
gi|60280430|gb|AY786394.1|
gi|60280432|gb|AY786395.1|
gi|60280434|gb|AY786396.1|
gi|60280436|gb|AY786397.1|
gi|60280438|gb|AY786398.1|
gi|60280440|gb|AY786399.1|
gi|60280442|gb|AY786400.1|
gi|60280444|gb|AY786401.1|
gi|60280446|gb|AY786402.1|
gi|60280448|gb|AY786403.1|
gi|60280450|gb|AY786404.1|
gi|60280452|gb|AY786405.1|
gi|60280454|gb|AY786406.1|
gi|169247421|gb|AY835999.4|
gi|145413586|gb|AY858035.2|
gi|145413588|gb|AY858036.2|
gi|145413590|gb|AY858037.2|
gi|145413591|gb|AY858038.2|
gi|145413593|gb|AY858039.2|
gi|145413595|gb|AY858040.2|
gi|145413597|gb|AY858041.2|
gi|145413598|gb|AY858042.2|
gi|145413600|gb|AY858043.2|
gi|145413601|gb|AY858044.2|
gi|145413603|gb|AY858045.2|
gi|145413605|gb|AY858046.2|
gi|145413606|gb|AY858047.2|
gi|145413607|gb|AY858048.2|
gi|57544909|gb|AY858049.1|
gi|57544911|gb|AY858050.1|
gi|57544913|gb|AY858983.1|
gi|58223367|gb|AY871812.1|
gi|58223369|gb|AY871813.1|
gi|58223371|gb|AY871814.1|
gi|58223373|gb|AY871815.1|
gi|58200716|gb|AY876494.1|
gi|59380876|gb|AY912454.1|
gi|59380899|gb|AY912455.1|
gi|59380986|gb|AY912458.1|
gi|60326968|gb|AY923865.1|
gi|62860903|gb|AY934757.1|
gi|61652904|gb|AY947539.1|
gi|63095152|gb|AY960625.1|
gi|63055832|gb|AY960628.1|
gi|63055843|gb|AY960629.1|
gi|63055859|gb|AY960630.1|
gi|63055876|gb|AY960631.1|
gi|63055893|gb|AY960632.1|
gi|63055907|gb|AY960633.1|
gi|63055922|gb|AY960634.1|
gi|63055935|gb|AY960635.1|
gi|51997336|emb|CQ867051.1|
gi|52745307|emb|CQ871190.1|
gi|52747869|emb|CQ874693.1|
gi|125993120|emb|CS477263.1|
gi|125993121|emb|CS477264.1|
gi|125993122|emb|CS477265.1|
gi|125993159|emb|CS477302.1|
gi|125993160|emb|CS477304.1|
gi|125993161|emb|CS477305.1|
gi|125993162|emb|CS477306.1|
gi|125994330|emb|CS479165.1|
gi|125994332|emb|CS479167.1|
gi|125994367|emb|CS479202.1|
gi|125994368|emb|CS479203.1|
gi|125994369|emb|CS479204.1|
gi|125994370|emb|CS479205.1|
gi|125994371|emb|CS479206.1|
gi|157390967|emb|CS673237.1|
gi|221238|dbj|D00345.1|DEN2PUO
gi|221230|dbj|D00346.1|DEN2NGC
gi|221246|dbj|D10513.1|DENEP1
gi|221248|dbj|D10514.1|DENEP2
gi|83959152|dbj|DD165112.1|
gi|83959153|dbj|DD165113.1|
gi|83959154|dbj|DD165114.1|
gi|168426037|dbj|DI128400.1|
gi|168426421|dbj|DI128958.1|
gi|168430198|dbj|DI133766.1|
gi|551440328|dbj|DI191091.1|
gi|551440329|dbj|DI191092.1|
gi|551449353|dbj|DI195805.1|
gi|724441460|dbj|DI387428.1|
gi|724441461|dbj|DI387429.1|
gi|724441462|dbj|DI387430.1|
gi|724441463|dbj|DI387431.1|
gi|724439332|dbj|DI401605.1|
gi|724439333|dbj|DI401606.1|
gi|724439334|dbj|DI401607.1|
gi|724439371|dbj|DI401644.1|
gi|724439372|dbj|DI401645.1|
gi|724439373|dbj|DI401646.1|
gi|724439374|dbj|DI401647.1|
gi|724443499|dbj|DI402998.1|
gi|724443500|dbj|DI402999.1|
gi|724443533|dbj|DI403032.1|
gi|724443534|dbj|DI403033.1|
gi|724443535|dbj|DI403034.1|
gi|724443536|dbj|DI403035.1|
gi|724443537|dbj|DI403036.1|
gi|207047265|dbj|DL138662.1|
gi|209822318|dbj|DL180618.1|
gi|253967650|dbj|DM140252.1|
gi|253967651|dbj|DM140253.1|
gi|253967652|dbj|DM140254.1|
gi|253967689|dbj|DM140291.1|
gi|253967690|dbj|DM140292.1|
gi|253967691|dbj|DM140293.1|
gi|253967692|dbj|DM140294.1|
gi|253967693|dbj|DM140295.1|
gi|253967694|dbj|DM140296.1|
gi|253967729|dbj|DM140331.1|
gi|253967730|dbj|DM140332.1|
gi|253967731|dbj|DM140333.1|
gi|253967732|dbj|DM140334.1|
gi|253967733|dbj|DM140335.1|
gi|269246075|dbj|DM460984.1|
gi|63175384|gb|DQ016644.1|
gi|63175386|gb|DQ016645.1|
gi|63175388|gb|DQ016646.1|
gi|63175390|gb|DQ016647.1|
gi|63175392|gb|DQ016648.1|
gi|63175394|gb|DQ016649.1|
gi|63175396|gb|DQ016650.1|
gi|63175398|gb|DQ016651.1|
gi|63175400|gb|DQ016652.1|
gi|63175402|gb|DQ016653.1|
gi|63175404|gb|DQ016654.1|
gi|63175406|gb|DQ016655.1|
gi|63175408|gb|DQ016656.1|
gi|63175410|gb|DQ016657.1|
gi|63175412|gb|DQ016658.1|
gi|63175414|gb|DQ016659.1|
gi|71841925|gb|DQ091258.1|
gi|71841927|gb|DQ091259.1|
gi|71841929|gb|DQ091260.1|
gi|71841931|gb|DQ091261.1|
gi|71841933|gb|DQ091262.1|
gi|71841935|gb|DQ091263.1|
gi|71841937|gb|DQ091264.1|
gi|71841939|gb|DQ091265.1|
gi|71841941|gb|DQ091266.1|
gi|71841943|gb|DQ091267.1|
gi|71841945|gb|DQ091268.1|
gi|71841947|gb|DQ091269.1|
gi|71841949|gb|DQ091270.1|
gi|71841951|gb|DQ091271.1|
gi|71841953|gb|DQ091272.1|
gi|71841955|gb|DQ091273.1|
gi|75993479|gb|DQ118864.1|
gi|75993481|gb|DQ118865.1|
gi|75993483|gb|DQ118866.1|
gi|75993485|gb|DQ118867.1|
gi|75993487|gb|DQ118868.1|
gi|75993489|gb|DQ118869.1|
gi|75993491|gb|DQ118870.1|
gi|75993493|gb|DQ118871.1|
gi|75993495|gb|DQ118872.1|
gi|75993497|gb|DQ118873.1|
gi|75993499|gb|DQ118874.1|
gi|75993501|gb|DQ118875.1|
gi|75993503|gb|DQ118876.1|
gi|75993505|gb|DQ118877.1|
gi|75993507|gb|DQ118878.1|
gi|75993509|gb|DQ118879.1|
gi|75993511|gb|DQ118880.1|
gi|75993513|gb|DQ118881.1|
gi|75993515|gb|DQ118882.1|
gi|75993517|gb|DQ118883.1|
gi|75993519|gb|DQ118884.1|
gi|75993521|gb|DQ118885.1|
gi|75993523|gb|DQ118886.1|
gi|75993525|gb|DQ118887.1|
gi|75993527|gb|DQ118888.1|
gi|75993529|gb|DQ118889.1|
gi|75993531|gb|DQ118890.1|
gi|75993533|gb|DQ118891.1|
gi|74027018|gb|DQ177886.1|
gi|74027020|gb|DQ177887.1|
gi|74027022|gb|DQ177888.1|
gi|74027024|gb|DQ177889.1|
gi|74027026|gb|DQ177890.1|
gi|74027028|gb|DQ177891.1|
gi|74027030|gb|DQ177892.1|
gi|74027032|gb|DQ177893.1|
gi|74027034|gb|DQ177894.1|
gi|74027036|gb|DQ177895.1|
gi|74027038|gb|DQ177896.1|
gi|74027040|gb|DQ177897.1|
gi|74027042|gb|DQ177898.1|
gi|74027044|gb|DQ177899.1|
gi|74027046|gb|DQ177900.1|
gi|74027048|gb|DQ177901.1|
gi|74027050|gb|DQ177902.1|
gi|74027052|gb|DQ177903.1|
gi|77024322|gb|DQ181797.1|
gi|77024324|gb|DQ181798.1|
gi|77024326|gb|DQ181799.1|
gi|77024328|gb|DQ181800.1|
gi|77024330|gb|DQ181801.1|
gi|77024332|gb|DQ181802.1|
gi|77024334|gb|DQ181803.1|
gi|77024336|gb|DQ181804.1|
gi|77024338|gb|DQ181805.1|
gi|77024340|gb|DQ181806.1|
gi|77024342|gb|DQ181807.1|
gi|77024344|gb|DQ181808.1|
gi|77024346|gb|DQ181809.1|
gi|77024348|gb|DQ181810.1|
gi|77024350|gb|DQ181811.1|
gi|77024352|gb|DQ181812.1|
gi|77024354|gb|DQ181813.1|
gi|77024356|gb|DQ181814.1|
gi|77024358|gb|DQ181815.1|
gi|77024360|gb|DQ181816.1|
gi|77024362|gb|DQ181817.1|
gi|77024364|gb|DQ181818.1|
gi|77024366|gb|DQ181819.1|
gi|77024368|gb|DQ181820.1|
gi|77024370|gb|DQ181821.1|
gi|77024372|gb|DQ181822.1|
gi|77024374|gb|DQ181823.1|
gi|77024376|gb|DQ181824.1|
gi|77024378|gb|DQ181825.1|
gi|77024380|gb|DQ181826.1|
gi|77024382|gb|DQ181827.1|
gi|77024384|gb|DQ181828.1|
gi|77024386|gb|DQ181829.1|
gi|77024388|gb|DQ181830.1|
gi|77024390|gb|DQ181831.1|
gi|77024392|gb|DQ181832.1|
gi|77024394|gb|DQ181833.1|
gi|77024396|gb|DQ181834.1|
gi|77024398|gb|DQ181835.1|
gi|77024400|gb|DQ181836.1|
gi|77024402|gb|DQ181837.1|
gi|77024404|gb|DQ181838.1|
gi|77024406|gb|DQ181839.1|
gi|77024408|gb|DQ181840.1|
gi|77024410|gb|DQ181841.1|
gi|77024412|gb|DQ181842.1|
gi|77024414|gb|DQ181843.1|
gi|77024416|gb|DQ181844.1|
gi|77024418|gb|DQ181845.1|
gi|77024420|gb|DQ181846.1|
gi|77024422|gb|DQ181847.1|
gi|77024424|gb|DQ181848.1|
gi|77024426|gb|DQ181849.1|
gi|77024428|gb|DQ181850.1|
gi|77024430|gb|DQ181851.1|
gi|77024432|gb|DQ181852.1|
gi|77024434|gb|DQ181853.1|
gi|77024436|gb|DQ181854.1|
gi|77024438|gb|DQ181855.1|
gi|77024440|gb|DQ181856.1|
gi|77024442|gb|DQ181857.1|
gi|77024444|gb|DQ181858.1|
gi|77024446|gb|DQ181859.1|
gi|77024448|gb|DQ181860.1|
gi|77024450|gb|DQ181861.1|
gi|77024452|gb|DQ181862.1|
gi|77024454|gb|DQ181863.1|
gi|77024456|gb|DQ181864.1|
gi|77024458|gb|DQ181865.1|
gi|77024460|gb|DQ181866.1|
gi|77024462|gb|DQ181867.1|
gi|77024464|gb|DQ181868.1|
gi|77024466|gb|DQ181869.1|
gi|77024468|gb|DQ181870.1|
gi|77024470|gb|DQ181871.1|
gi|77024472|gb|DQ181872.1|
gi|77024474|gb|DQ181873.1|
gi|77024476|gb|DQ181874.1|
gi|77024478|gb|DQ181875.1|
gi|77024480|gb|DQ181876.1|
gi|77024482|gb|DQ181877.1|
gi|77024484|gb|DQ181878.1|
gi|77024486|gb|DQ181879.1|
gi|77024488|gb|DQ181880.1|
gi|77024490|gb|DQ181881.1|
gi|77024492|gb|DQ181882.1|
gi|77024494|gb|DQ181883.1|
gi|77024496|gb|DQ181884.1|
gi|77024498|gb|DQ181885.1|
gi|77024500|gb|DQ181886.1|
gi|77024502|gb|DQ181887.1|
gi|77024504|gb|DQ181888.1|
gi|77024506|gb|DQ181889.1|
gi|77024508|gb|DQ181890.1|
gi|77024510|gb|DQ181891.1|
gi|77024512|gb|DQ181892.1|
gi|77024514|gb|DQ181893.1|
gi|77024516|gb|DQ181894.1|
gi|77024518|gb|DQ181895.1|
gi|77024520|gb|DQ181896.1|
gi|77024522|gb|DQ181897.1|
gi|77024524|gb|DQ181898.1|
gi|77024526|gb|DQ181899.1|
gi|77024528|gb|DQ181900.1|
gi|77024530|gb|DQ181901.1|
gi|76057123|gb|DQ193572.1|
gi|76160916|gb|DQ211348.1|
gi|76160918|gb|DQ211349.1|
gi|81298780|gb|DQ264868.1|
gi|81298782|gb|DQ264869.1|
gi|81298784|gb|DQ264870.1|
gi|81298786|gb|DQ264871.1|
gi|81298788|gb|DQ264872.1|
gi|81298790|gb|DQ264873.1|
gi|81298792|gb|DQ264874.1|
gi|81298794|gb|DQ264875.1|
gi|81298796|gb|DQ264876.1|
gi|81298798|gb|DQ264877.1|
gi|81298800|gb|DQ264878.1|
gi|81298802|gb|DQ264879.1|
gi|81298804|gb|DQ264880.1|
gi|81298806|gb|DQ264881.1|
gi|81298808|gb|DQ264882.1|
gi|81298809|gb|DQ264883.1|
gi|81301423|gb|DQ264884.1|
gi|81301425|gb|DQ264885.1|
gi|81301426|gb|DQ264886.1|
gi|81301428|gb|DQ264887.1|
gi|81301430|gb|DQ264888.1|
gi|81301431|gb|DQ264889.1|
gi|81301433|gb|DQ264890.1|
gi|81301434|gb|DQ264891.1|
gi|81301436|gb|DQ264892.1|
gi|81301438|gb|DQ264893.1|
gi|81301440|gb|DQ264894.1|
gi|81301441|gb|DQ264895.1|
gi|81301442|gb|DQ264896.1|
gi|81301443|gb|DQ264897.1|
gi|81301445|gb|DQ264898.1|
gi|81301447|gb|DQ264899.1|
gi|81301449|gb|DQ264900.1|
gi|81301451|gb|DQ264901.1|
gi|81301452|gb|DQ264902.1|
gi|81301454|gb|DQ264903.1|
gi|81301455|gb|DQ264904.1|
gi|81301457|gb|DQ264905.1|
gi|81301459|gb|DQ264906.1|
gi|81301460|gb|DQ264907.1|
gi|81301462|gb|DQ264908.1|
gi|81301464|gb|DQ264909.1|
gi|81301466|gb|DQ264910.1|
gi|81301468|gb|DQ264911.1|
gi|81301470|gb|DQ264912.1|
gi|81301472|gb|DQ264913.1|
gi|81301474|gb|DQ264914.1|
gi|81301476|gb|DQ264915.1|
gi|81301478|gb|DQ264916.1|
gi|81301480|gb|DQ264917.1|
gi|81301482|gb|DQ264918.1|
gi|81301484|gb|DQ264919.1|
gi|81301485|gb|DQ264920.1|
gi|81301486|gb|DQ264921.1|
gi|81301488|gb|DQ264922.1|
gi|81301490|gb|DQ264923.1|
gi|81301492|gb|DQ264924.1|
gi|81301494|gb|DQ264925.1|
gi|81301496|gb|DQ264926.1|
gi|81301498|gb|DQ264927.1|
gi|81301500|gb|DQ264928.1|
gi|81301502|gb|DQ264929.1|
gi|81301504|gb|DQ264930.1|
gi|81301506|gb|DQ264931.1|
gi|81301508|gb|DQ264932.1|
gi|81301510|gb|DQ264933.1|
gi|81301512|gb|DQ264934.1|
gi|81301514|gb|DQ264935.1|
gi|81301516|gb|DQ264936.1|
gi|81301518|gb|DQ264937.1|
gi|81301520|gb|DQ264938.1|
gi|81301522|gb|DQ264939.1|
gi|81301524|gb|DQ264940.1|
gi|81301526|gb|DQ264941.1|
gi|81301528|gb|DQ264942.1|
gi|81301530|gb|DQ264943.1|
gi|81301531|gb|DQ264944.1|
gi|81301533|gb|DQ264945.1|
gi|81301535|gb|DQ264946.1|
gi|81301537|gb|DQ264947.1|
gi|81301539|gb|DQ264948.1|
gi|81301650|gb|DQ264949.1|
gi|81301652|gb|DQ264950.1|
gi|81301654|gb|DQ264951.1|
gi|81301656|gb|DQ264952.1|
gi|81301658|gb|DQ264953.1|
gi|81301660|gb|DQ264954.1|
gi|81301662|gb|DQ264955.1|
gi|81301664|gb|DQ264956.1|
gi|81301666|gb|DQ264957.1|
gi|81301668|gb|DQ264958.1|
gi|81301670|gb|DQ264959.1|
gi|81301672|gb|DQ264960.1|
gi|81301674|gb|DQ264961.1|
gi|81301676|gb|DQ264962.1|
gi|81301677|gb|DQ264963.1|
gi|81301678|gb|DQ264964.1|
gi|81301680|gb|DQ264965.1|
gi|81301682|gb|DQ264966.1|
gi|81301684|gb|DQ264967.1|
gi|81301686|gb|DQ264968.1|
gi|81301687|gb|DQ264969.1|
gi|81301688|gb|DQ264970.1|
gi|81301690|gb|DQ264971.1|
gi|81301692|gb|DQ264972.1|
gi|81301693|gb|DQ264973.1|
gi|81301695|gb|DQ264974.1|
gi|81301697|gb|DQ264975.1|
gi|81301698|gb|DQ264976.1|
gi|81301699|gb|DQ264977.1|
gi|81301700|gb|DQ264978.1|
gi|81301701|gb|DQ264979.1|
gi|81301703|gb|DQ264980.1|
gi|81301705|gb|DQ264981.1|
gi|81301707|gb|DQ264982.1|
gi|81301709|gb|DQ264983.1|
gi|81301711|gb|DQ264984.1|
gi|81301713|gb|DQ264985.1|
gi|81301714|gb|DQ264986.1|
gi|81301715|gb|DQ264987.1|
gi|81301716|gb|DQ264988.1|
gi|81301717|gb|DQ264989.1|
gi|81301719|gb|DQ264990.1|
gi|81301720|gb|DQ264991.1|
gi|81301722|gb|DQ264992.1|
gi|81301723|gb|DQ264993.1|
gi|81301724|gb|DQ264994.1|
gi|81301725|gb|DQ264995.1|
gi|81301726|gb|DQ264996.1|
gi|81301728|gb|DQ264997.1|
gi|81301729|gb|DQ264998.1|
gi|81301730|gb|DQ264999.1|
gi|81301732|gb|DQ265000.1|
gi|81301733|gb|DQ265001.1|
gi|81301734|gb|DQ265002.1|
gi|81301736|gb|DQ265003.1|
gi|81301737|gb|DQ265004.1|
gi|81301739|gb|DQ265005.1|
gi|81301741|gb|DQ265006.1|
gi|81301742|gb|DQ265007.1|
gi|81301744|gb|DQ265008.1|
gi|81301745|gb|DQ265009.1|
gi|81301746|gb|DQ265010.1|
gi|81301748|gb|DQ265011.1|
gi|81301750|gb|DQ265012.1|
gi|81301751|gb|DQ265013.1|
gi|81301753|gb|DQ265014.1|
gi|81301754|gb|DQ265015.1|
gi|81301755|gb|DQ265016.1|
gi|81301756|gb|DQ265017.1|
gi|81301757|gb|DQ265018.1|
gi|81301759|gb|DQ265019.1|
gi|81301761|gb|DQ265020.1|
gi|81301763|gb|DQ265021.1|
gi|81301764|gb|DQ265022.1|
gi|81301766|gb|DQ265023.1|
gi|81301768|gb|DQ265024.1|
gi|81301769|gb|DQ265025.1|
gi|81301770|gb|DQ265026.1|
gi|81301772|gb|DQ265027.1|
gi|81301773|gb|DQ265028.1|
gi|81301774|gb|DQ265029.1|
gi|81301775|gb|DQ265030.1|
gi|81301777|gb|DQ265031.1|
gi|81301779|gb|DQ265032.1|
gi|81301780|gb|DQ265033.1|
gi|81301781|gb|DQ265034.1|
gi|81301782|gb|DQ265035.1|
gi|81301784|gb|DQ265036.1|
gi|81301785|gb|DQ265037.1|
gi|81301786|gb|DQ265038.1|
gi|81301787|gb|DQ265039.1|
gi|81301789|gb|DQ265040.1|
gi|81301791|gb|DQ265041.1|
gi|81301793|gb|DQ265042.1|
gi|81301794|gb|DQ265043.1|
gi|81301795|gb|DQ265044.1|
gi|81301797|gb|DQ265045.1|
gi|81301799|gb|DQ265046.1|
gi|81301801|gb|DQ265047.1|
gi|81301803|gb|DQ265048.1|
gi|81301805|gb|DQ265049.1|
gi|81301807|gb|DQ265050.1|
gi|81301809|gb|DQ265051.1|
gi|81301811|gb|DQ265052.1|
gi|81301813|gb|DQ265053.1|
gi|81301815|gb|DQ265054.1|
gi|81301817|gb|DQ265055.1|
gi|81301819|gb|DQ265056.1|
gi|81301821|gb|DQ265057.1|
gi|81301823|gb|DQ265058.1|
gi|81301825|gb|DQ265059.1|
gi|81301826|gb|DQ265060.1|
gi|81301828|gb|DQ265061.1|
gi|81301830|gb|DQ265062.1|
gi|81301832|gb|DQ265063.1|
gi|81301834|gb|DQ265064.1|
gi|81301836|gb|DQ265065.1|
gi|81301838|gb|DQ265066.1|
gi|81301840|gb|DQ265067.1|
gi|81301841|gb|DQ265068.1|
gi|81301843|gb|DQ265069.1|
gi|81301845|gb|DQ265070.1|
gi|81301847|gb|DQ265071.1|
gi|81301849|gb|DQ265072.1|
gi|81301851|gb|DQ265073.1|
gi|81301853|gb|DQ265074.1|
gi|81301855|gb|DQ265075.1|
gi|81301857|gb|DQ265076.1|
gi|81301859|gb|DQ265077.1|
gi|81301861|gb|DQ265078.1|
gi|81301863|gb|DQ265079.1|
gi|81301865|gb|DQ265080.1|
gi|81301867|gb|DQ265081.1|
gi|81301869|gb|DQ265082.1|
gi|81301871|gb|DQ265083.1|
gi|81301873|gb|DQ265084.1|
gi|81301875|gb|DQ265085.1|
gi|81301877|gb|DQ265086.1|
gi|81301879|gb|DQ265087.1|
gi|81301881|gb|DQ265088.1|
gi|81301883|gb|DQ265089.1|
gi|81301885|gb|DQ265090.1|
gi|81301887|gb|DQ265091.1|
gi|81301889|gb|DQ265092.1|
gi|81301891|gb|DQ265093.1|
gi|81301893|gb|DQ265094.1|
gi|81301895|gb|DQ265095.1|
gi|81301897|gb|DQ265096.1|
gi|81301898|gb|DQ265097.1|
gi|81301899|gb|DQ265098.1|
gi|81301901|gb|DQ265099.1|
gi|81301902|gb|DQ265100.1|
gi|81301903|gb|DQ265101.1|
gi|81301905|gb|DQ265102.1|
gi|81301907|gb|DQ265103.1|
gi|81301908|gb|DQ265104.1|
gi|81301910|gb|DQ265105.1|
gi|81301912|gb|DQ265106.1|
gi|81301913|gb|DQ265107.1|
gi|81301915|gb|DQ265108.1|
gi|81301916|gb|DQ265109.1|
gi|81301918|gb|DQ265110.1|
gi|81301919|gb|DQ265111.1|
gi|81301921|gb|DQ265112.1|
gi|81301922|gb|DQ265113.1|
gi|81301923|gb|DQ265114.1|
gi|81301924|gb|DQ265115.1|
gi|81301926|gb|DQ265116.1|
gi|81301927|gb|DQ265117.1|
gi|81301929|gb|DQ265118.1|
gi|81301930|gb|DQ265119.1|
gi|81301932|gb|DQ265120.1|
gi|81301933|gb|DQ265121.1|
gi|81301935|gb|DQ265122.1|
gi|81301936|gb|DQ265123.1|
gi|81301938|gb|DQ265124.1|
gi|81301939|gb|DQ265125.1|
gi|81301940|gb|DQ265126.1|
gi|81301941|gb|DQ265127.1|
gi|81301942|gb|DQ265128.1|
gi|81301944|gb|DQ265129.1|
gi|81301945|gb|DQ265130.1|
gi|81301946|gb|DQ265131.1|
gi|81301947|gb|DQ265132.1|
gi|81301949|gb|DQ265133.1|
gi|81301950|gb|DQ265134.1|
gi|81301951|gb|DQ265135.1|
gi|81301952|gb|DQ265136.1|
gi|81301954|gb|DQ265137.1|
gi|81301956|gb|DQ265138.1|
gi|81301958|gb|DQ265139.1|
gi|81301960|gb|DQ265140.1|
gi|81301961|gb|DQ265141.1|
gi|81301962|gb|DQ265142.1|
gi|81301963|gb|DQ265143.1|
gi|81301965|gb|DQ265144.1|
gi|81301966|gb|DQ265145.1|
gi|81301968|gb|DQ265146.1|
[truncated: 9,154 more rows]
