# Supplementary material for: Application of a targeted-enrichment methodology for full-genome sequencing of Dengue 1-4, Chikungunya and Zika viruses directly from patient samples
Source: PLoS Negl Trop Dis. 2019 Apr 25;13(4):e0007184. doi: 10.1371/journal.pntd.0007184 (PMC6504110; doi:10.1371/journal.pntd.0007184)
Supplement: S3 Table — (XLSX) [file pntd.0007184.s008.xlsx]

## Sheet: Sheet1
S3 Table - Summary statistics of NGS analysis
Experiment		Read length		Fragment Length		Mapping			Duplicates			Low frequency variants	Enriched vs Unenriched		Viral Genome
	Virus	mean	sd	mean	sd	Total reads	Reads mapped	% mapped	Reads duplicate	% mapped	% duplicates	# of SNPs	% Enriched (log)	# of common SNPs	NCBI sequence ID	NCBI strain
Unenriched
	DENV 1 (cultured in huh-7)	193.337	59.1352	224.237	102.002	1298064	7046	0.542808	729	0.000561606	0.0561606	0			JN054255.1	Dengue virus 1 isolate DV1_SL_2010b
	DENV 2 (cultured in huh-7)	198.592	57.7168	233.73	103.197	848018	34040	4.01407	5638	0.00664844	0.664844	0			KM204118.1	Dengue virus 2 strain New Guinea C
	DENV 3 (cultured in huh-7)	185.857	58.1977	195.09	75.4642	833854	2699	0.323678	246	0.000295016	0.0295016	0			EU081190.1	Dengue virus type 3 strain D3/SG/05K863DK1/2005
	DENV 4 (cultured in huh-7)	168.807	54.4041	177.574	71.3672	1072957	4945	0.460876	682	0.000635627	0.0635627	0			JQ922560.1	Dengue virus 4 isolate DENV-4/IND/0952326/2009
	Zika (cultured in vero)	168.193	58.1362	175.609	72.9426	842710	6036	0.716261	512	0.000607564	0.0607564	0			KX369547.1	Zika virus strain PF13/251013-18
	Chikungunya (cultured in bhk)	170.916	61.5958	163.035	64.334	902462	210048	23.275	106335	0.117828	11.7828	4			AF490259.3	Chikungunya virus strain Ross
	05K4172 EDEN DENV1	234.637	36.0748	361.177	136.48	616507	477504	77.4531	143062	0.232053	23.2053	15			EU081261.1	Dengue virus type 1 strain D1/SG/05K4172DK1/2005
	06K2352 EDEN DENV2	232.123	38.4816	352.036	140.313	510946	463467	90.7076	140163	0.274321	27.4321	11			AY858035.2	Dengue virus 2 strain BA05i
	05K4176 EDEN DENV3	238.954	31.0335	382.963	133.739	75425	23401	31.0255	3939	0.0522241	5.22241	0			EU081219.1	Dengue virus type 3 strain D3/SG/05K4176DK1/2005
	SL558 Sri Lanka DENV4	242.016	24.0345	400.085	135.737	436218	434	0.0994915	74	0.00016964	0.016964	0			JQ922560.1	Dengue virus 4 isolate DENV-4/IND/0952326/2009
Enriched
	DENV 1 (cultured in huh-7)	211.431	49.1785	247.792	91.4688	855490	627471	73.3464	348531	0.407405	40.7405	62	2.13073	0	JN054255.1	Dengue virus 1 isolate DV1_SL_2010b
	DENV 2 (cultured in huh-7)	210.191	49.9535	254.244	102.094	652843	627428	96.107	353499	0.541476	54.1476	91	1.37917	0	KM204118.1	Dengue virus 2 strain New Guinea C
	DENV 3 (cultured in huh-7)	208.474	48.7376	236.884	83.4079	938070	819632	87.3743	581298	0.619674	61.9674	92	2.43127	0	EU081190.1	Dengue virus type 3 strain D3/SG/05K863DK1/2005
	DENV 4 (cultured in huh-7)	176.52	46.0009	184.696	60.8245	772546	544303	70.4557	458673	0.593716	59.3716	50	2.18433	0	JQ922560.1	Dengue virus 4 isolate DENV-4/IND/0952326/2009
	Zika (cultured in vero)	193.539	51.2704	204.938	68.7203	906906	776813	85.6553	581842	0.641568	64.1568	85	2.07768	0	KX369547.1	Zika virus strain PF13/251013-18
	Chikungunya (cultured in bhk)	167.742	54.6329	171.561	65.506	746140	734376	98.4234	473375	0.634432	63.4432	46	0.626209	4	AF490259.3	Chikungunya virus strain Ross
	05K4172 EDEN DENV1	232.932	36.7229	336.363	126.254	763771	760696	99.5974	276191	0.361615	36.1615	21	0.109209	9	EU081261.1	Dengue virus type 1 strain D1/SG/05K4172DK1/2005
	06K2352 EDEN DENV2	223.409	43.2192	292.794	112.735	883136	878952	99.5262	357267	0.404544	40.4544	23	0.0402938	4	AY858035.2	Dengue virus 2 strain BA05i
	05K4176 EDEN DENV3	240.86	26.6981	372.906	126.357	731062	717919	98.2022	428838	0.586596	58.6596	145	0.500402	0	EU081219.1	Dengue virus type 3 strain D3/SG/05K4176DK1/2005
	SL558 Sri Lanka DENV4	246.83	16.5084	426.38	124.519	510781	481075	94.1842	436504	0.854582	85.4582	16	2.97619	0	JQ922560.1	Dengue virus 4 isolate DENV-4/IND/0952326/2009
ZIKV Dilution series
	Zika (ct 29.79)	238.849	30.517	366.177	134.805	822418	560089	68.1027	314142	0.381974	38.1974	53			KX369547.1	Zika virus strain PF13/251013-18
	Zika (ct 31.57)	244.223	21.2972	385.306	121.179	645343	143269	22.2004	69261	0.107324	10.7324	58			KX369547.1	Zika virus strain PF13/251013-18
	Zika (ct 33.45)	243.349	23.8231	396.724	128.13	830293	21332	2.56921	7142	0.00860178	0.860178	24			KX369547.1	Zika virus strain PF13/251013-18
	Zika (ct 35.60)	234.745	29.5525	302.328	104.728	1001278	5350	0.534317	1646	0.0016439	0.16439	0			KX369547.1	Zika virus strain PF13/251013-18
	Zika (ct 37.79)	239.969	25.7434	359.911	125.59	976276	1495	0.153133	432	0.000442498	0.0442498	0			KX369547.1	Zika virus strain PF13/251013-18
	Zika (ct 41.08)	237.604	31.3089	342.086	127.757	750119	773	0.10305	225	0.000299952	0.0299952	0			KX369547.1	Zika virus strain PF13/251013-18
data not graphed	Enriched uninfected vero	228.574	40.043	320.571	107.87	1047168	333	0.0318001	15	1.43243e-05	0.00143243	0			KX369547.1	Zika virus strain PF13/251013-18
DENV Dilution series
data not graphed	DENV2 (ct 23.51)	224.618	44.2233	299.728	114.427	3117017	2905558	93.216	1862403	64.0979	59.7495	93			KM204118	Dengue 2 New Guinea, 1944
data not graphed	DENV2 (ct 23.93)	226.198	42.4584	297.909	108.4	2688377	2449430	91.1118	1582372	64.6016	58.8598	88			KM204118	Dengue 2 New Guinea, 1944
data not graphed	DENV2 (ct 25.30)	233.658	35.9231	322.361	109.202	2373207	2194989	92.4904	1573438	71.6832	66.3001	80			KM204118	Dengue 2 New Guinea, 1944
data not graphed	DENV2 (ct 27.50)	232.623	36.5087	314.901	104.399	5493448	4772422	86.8748	4371477	91.5987	79.5762	67			KM204118	Dengue 2 New Guinea, 1944
data not graphed	DENV2 (ct 29.49)	234.39	35.4047	322.364	105.598	2884897	2117252	73.3909	1959940	92.57	67.938	65			KM204118	Dengue 2 New Guinea, 1944
data not graphed	DENV2 (ct 32.10)	237.364	31.7752	348.656	117.138	3262835	810045	24.8264	760404	93.8718	23.305	31			KM204118	Dengue 2 New Guinea, 1944
data not graphed	DENV2 (ct 33.78)	235.744	32.7756	324.817	102.875	2811761	208245	7.40621	195452	93.8568	6.95123	0			KM204118	Dengue 2 New Guinea, 1944
data not graphed	DENV2 (ct 35.24)	234.418	34.0137	257.404	67.3068	1991704	66964	3.36215	61433	91.7403	3.08444	0			KM204118	Dengue 2 New Guinea, 1944
data not graphed	Enriched uninfected Huh7	220.769	46.783	286.352	112.918	3525320	2127	0.0603349	230	10.8134	0.00652423	0			KM204118	Dengue 2 New Guinea, 1944
												*SNPs are called for genomic regions with reads coverage >1000
